## **Molecular mechanisms of gating in the calcium-activated chloride channel bestrophin**

**Authors:** Alexandria N. Miller<sup>1\*</sup>, George Vaisey<sup>1,2\*</sup> & Stephen B. Long

**Author affiliation:**

<sup>1</sup>Structural Biology Program and <sup>2</sup>Louis V. Gerstner Jr. Graduate School of Biomedical Sciences, Memorial Sloan Kettering Cancer Center, 1275 York Avenue, New York, NY 10065, USA. \*These authors contributed equally to this work.

**Abstract**

Bestrophin (BEST1-4 in humans) channels are ligand gated chloride (Cl<sup>-</sup>) channels that are activated by calcium (Ca<sup>2+</sup>). Mutations in BEST1 cause retinal degenerative diseases. Partly because these channels have no sequence or structural similarity to other ion channels, the molecular mechanisms underlying gating are unknown. Here, we present a series of cryo-electron microscopy (cryo-EM) structures of chicken BEST1, determined at 3.1 Å resolution or better, that represent the principal gating states of the channel. Unlike other channels, opening of the pore is due to the repositioning of tethered pore-lining helices within a surrounding protein shell that dramatically widens a “neck” of the pore through a concertina of amino acid rearrangements within the protein core. The neck serves as both the activation and the inactivation gate. The binding of Ca<sup>2+</sup> to a cytosolic domain instigates pore opening and the structures reveal that, unlike voltage-gated Na<sup>+</sup> and K<sup>+</sup> channels, similar molecular rearrangements are responsible for inactivation and deactivation. A single aperture within the 95 Å-long opened pore separates the cytosol from the extracellular milieu and controls anion permeability. The studies define the basis for Ca<sup>2+</sup>-activated Cl<sup>-</sup> channel function and reveal a new molecular paradigm for gating in ligand-gated ion channels.

1           The family of bestrophin proteins (BEST1-4) was identified by linkage analysis to  
2   hereditary macular degenerations caused by mutations in BEST1 (1, 2); to date more than 200  
3   mutations in BEST1 are linked with eye disease (3, 4). BEST1-4 proteins are expressed in the  
4   plasma membrane and form Ca<sup>2+</sup>-activated Cl<sup>-</sup> channels by assembling as pentamers (5-9). Data  
5   suggest that BEST1 mediates a Ca<sup>2+</sup>-activated Cl<sup>-</sup> current that is integral to human retinal  
6   pigment epithelial function (10). The broad tissue distribution of the family suggests additional  
7   physiological functions that are not fully realized (5), and these may include processes as  
8   diverse as cell volume regulation (11), pH homeostasis (12), and neurotransmitter release (13).  
9   An X-ray structure of chicken BEST1, which shares 74 % sequence identity with human BEST1  
10   and possesses analogous Ca<sup>2+</sup>-activation and anion-selectivity properties, revealed an  
11   architecture that is distinct from other ion channel families (6). A prokaryotic ion channel  
12   (KpBest) has discernable sequence (14 % identity) and structural homology with BEST1, but  
13   the Ca<sup>2+</sup>-activated Cl<sup>-</sup> channel function of bestrophin proteins appears specific to metazoan  
14   organisms; KpBest is cation-selective and not activated by Ca<sup>2+</sup> (14). The pore of BEST1 contains  
15   two hydrophobic constrictions, the “neck” and the “aperture”, and ostensibly either of these  
16   could function as a gate. Ionic currents through BEST1 have recently been found to decrease  
17   over time due to the inactivation of the channel, which is caused by the binding of a C-terminal  
18   peptide to a receptor on the channel’s cytosolic surface (15). Because the inactivation peptide is  
19   bound to its receptor in the structure and because the antibody that was used as a  
20   crystallization chaperone also promotes inactivation, we now realize that the previously  
21   determined structure of BEST1 likely represents an inactivated state (6, 15). How the channel  
22   opens is not known.

23           To begin to address the conformational changes associated with channel opening, we

24 determined a 3.1 Å resolution cryo-EM structure of BEST1 without an antibody (the same  
25 construct used for X-ray studies, comprising residues 1-405, and termed BEST1<sub>405</sub>). From single  
26 particle analysis we obtained a single conformation, which is indistinguishable from the X-ray  
27 structure, including a bound inactivation peptide, and therefore this presumably also  
28 represents a Ca<sup>2+</sup>-bound inactivated state (fig. S1, fig. S3; RMSD for C $\alpha$  atoms =0.5 Å). This  
29 result suggests that antibody binding does not distort the channel from a native conformation  
30 and that differences we might observe in channel structures are not the result of differences in  
31 methodologies between cryo-EM and X-ray crystallography.

32 In an aim to obtain structural information on an open conformation of the channel, we  
33 removed the C-terminal inactivation peptide (by using a construct spanning amino acids 1-345,  
34 termed BEST1<sub>345</sub>) and used this for cryo-EM studies. Importantly, whilst BEST1<sub>345</sub> does not  
35 inactivate, it possesses normal Cl<sup>-</sup> selectivity and Ca<sup>2+</sup>-dependent activation (15). Single particle  
36 cryo-EM analysis of Ca<sup>2+</sup>-bound BEST1<sub>345</sub> (fig. S2, fig. S3, fig. S5) revealed two distinct  
37 conformations of the channel (Fig. 1). The first, determined at 3.0 Å resolution, represents 86%  
38 of the particles and is essentially indistinguishable from the structure of BEST1<sub>405</sub> (Fig. 1a, fig.  
39 S1c, RMSD for C $\alpha$  atoms =0.5Å), except for the absence of the inactivation peptide. Because  
40 BEST1<sub>345</sub> does not inactivate, the structure presumably represents a Ca<sup>2+</sup>-bound closed  
41 conformation. In this and in the inactivated structure, the neck adopts an indistinguishable  
42 closed conformation (Fig. 2c). The second structure, which represents 14% of the particles and  
43 is determined to 2.9 Å resolution, contains a dramatically widened pore within the neck (Fig.  
44 1b). Based on discussions presented herein we conclude that this represents the open  
45 conformation of the channel. The relative abundance of the closed conformation suggests that  
46 it is energetically favorable.

47 In the closed conformation, the neck is less than 3.5 Å in diameter and approximately 15  
48 Å long; three hydrophobic amino acids on the neck helix (S2b) from each of the channel's five  
49 subunits, I76, F80 and F84, form its walls (Fig. 1a, c, d) (6). Its narrowness, length and  
50 hydrophobicity create an energetic barrier to ion permeation that seals the channel shut by  
51 hydrophobic block (16). In the open conformation, the neck has dilated to approximately 13 Å  
52 in diameter, which is more than sufficient to allow permeation of hydrated Cl<sup>-</sup> ions (Fig. 1c). No  
53 appreciable conformational difference is present in the cytosolic region of the channel, and in  
54 particular, the aperture constriction of the pore retains its dimensions.

55 Comparison of the open and closed conformations of the neck highlights an unusual  
56 structural element of the pore that distinguishes the mechanism of gating in BEST1 from most  
57 other channels. The neck helix (S2b) is flanked on both of its ends by disruptions of α-helical  
58 secondary structure. These disruptions provide impressive flexibility on the one hand and  
59 tethering on the other that allow the helix to “float” between closed and open conformations  
60 (Fig. 2). In the closed conformation, hydrophobic packing at the center of the neck among the  
61 I76, F80 and F84 residues themselves stabilize this conformation. In the open conformation,  
62 the tendency of the phenylalanine residues to seclude their hydrophobicity from an aqueous  
63 environment is satisfied by their interactions with other hydrophobic amino acids (Y236 and  
64 W287) on the S3b and S4a helices located behind the neck helix (Fig. 2 b). The conformational  
65 change moves F80 and F84 away from the center of the pore and involves a slight rotation along  
66 the helical axis of S2b (~ 10 ° clockwise viewed from the extracellular side), outward  
67 displacement of S2b (~ 2.5 Å at F80), a slight expansion of the entire transmembrane region (~  
68 1 Å increase in radius), and a coordinated set of side chain rotamer changes (Fig. 2a, b and  
69 video). Both F80 and F84 move from the most commonly observed rotamer for phenylalanine



70 (observed 44% of the time in the pdb) in the closed conformation to the second most  
71 commonly-observed rotamer conformation (observed 33% of the time) in the open  
72 conformation (17). By these conformational changes, F80 and F84 rotate away from the axis of  
73 the pore by 80° and 105°, respectively (Fig. 2, fig. S5). In a domino effect, side chain rotamer  
74 changes of Y236, F282, F283, and W287 allow for the movements of F80 and F84 (Fig. 2a, b and  
75 movie S1). The conformational change in I76 is also dramatic. When the channel opens, the  
76 first  $\alpha$ -helical turn of the neck helix unravels such that I76 packs with F247, F276, L279 and  
77 F283 in the open conformation and has shifted by approximately 10 Å (fig. S5a, d). The  
78 unraveling is facilitated by P77, which is perfectly conserved among BEST channels and is part  
79 of the neck helix in its closed conformation, but marks its N-terminal end in the open  
80 conformation (Fig. 2c, d). The repositioning within the neck also exposes S79 and G83 on the  
81 neck helix, which are secluded behind the F80 and F84 in the closed conformation, to the pore  
82 in the open conformation (Fig. 2a,b and video). Thus, through a concertina of coordinated  
83 conformational changes in and around the neck helix, amino acids that formed the hydrophobic  
84 barrier that prevented ion permeation have dispersed and reveal a wide aqueous vestibule.

85 To address how Ca<sup>2+</sup> binding contributes to BEST1 channel gating, we determined the  
86 cryo-EM structure of BEST1<sub>345</sub> in the absence of Ca<sup>2+</sup> to 3.0 Å resolution (fig. S6, fig. S7; a cryo-  
87 EM structure of BEST1<sub>405</sub> without Ca<sup>2+</sup> was also determined, at 3.6 Å resolution, and is  
88 indistinguishable). The Ca<sup>2+</sup>-free structure is very similar to the inactivated and Ca<sup>2+</sup>-bound  
89 closed conformations with the only notable differences near the Ca<sup>2+</sup> clasp (fig. S8). Of  
90 particular note, the neck shares the same closed conformation as in the inactivated and Ca<sup>2+</sup>-  
91 bound closed structures (Fig. 2c). In structures with Ca<sup>2+</sup> bound, the five Ca<sup>2+</sup> clasps, one from  
92 each subunit, resemble a belt that wraps around the midsection of BEST1 (Fig. 1a,b). Without

93  $\text{Ca}^{2+}$ , the majority of the  $\text{Ca}^{2+}$  clasp becomes disordered (fig. S8b). 3D classification of the  $\text{Ca}^{2+}$ -  
94 free dataset yielded only closed conformations of the neck but did indicate a degree of flexibility  
95 in the channel between the transmembrane and cytosolic regions that was manifested as a  $\sim 5^\circ$   
96 rotation along the symmetry axis (fig. S8c). This conformational flexibility was not observed in  
97 the  $\text{Ca}^{2+}$ -bound datasets, which suggests that  $\text{Ca}^{2+}$  binding rigidifies the channel and we  
98 hypothesize that this may be necessary for stabilization of the open conformation.

99 To investigate how the coupling of the amino acid side chain movements are involved in  
100 the transition between the open and closed conformations of the neck and how  $\text{Ca}^{2+}$  binding  
101 might bias these, we studied the effects of mutating W287 to phenylalanine. W287 is highly  
102 conserved among BEST channels. We chose to study this residue because it adopts one side  
103 chain rotamer and packs with both F80 and F84 in the open conformation of the neck and  
104 another side chain rotamer in the closed conformation that buttresses the space between  
105 adjacent S2b helices (Figs. 2a,b and 3d,e), and thus it might govern conformational changes in  
106 the neck. We find that the W287F mutation produces channels with dramatically altered gating.  
107 Whilst the W287F mutant retained normal  $\text{Cl}^-$  versus  $\text{K}^+$  selectivity (Fig. 3a), the mutation makes  
108 the channel nearly insensitive to  $\text{Ca}^{2+}$ ; approximately 80% of the  $\text{Cl}^-$  current level was  
109 maintained when  $\text{Ca}^{2+}$  was chelated with EGTA (Fig. 3a,b). To understand the molecular basis  
110 of this behavior, we determined cryo-EM structures of the W287F mutant in the presence and  
111 absence of  $\text{Ca}^{2+}$  at 2.7 Å and 3.0 Å resolutions, respectively (fig. S7, 9). In  $\text{Ca}^{2+}$ , the channel  
112 adopts an open conformation that is essentially indistinguishable from the open conformation  
113 observed for BEST<sub>1345</sub> (fig. S9,  $\text{C}\alpha$  RMSD = 0.2Å). Unlike BEST<sub>1345</sub>, 3D classification did not  
114 reveal a closed conformation within the cryo-EM dataset, which indicates that essentially all of  
115 the particles are in an open conformation and that the open state is preferential for this mutant.

116 In the absence of  $\text{Ca}^{2+}$ , in spite of missing density for  $\text{Ca}^{2+}$  and a disordered  $\text{Ca}^{2+}$ -clasp region,  
117 the neck also adopts an open conformation (Fig 3c and fig. S9). Thus, in accord with the  
118 electrophysiological recordings, the W287F mutation decouples  $\text{Ca}^{2+}$  binding from the  
119 conformational changes in the activation gate. Modeling of the W287F mutation on a closed  
120 conformation of the channel introduces a void behind the neck (fig. S9h), which we hypothesize  
121 energetically disfavors the closed conformation. The effects of the relatively conservative  
122 mutation of tryptophan to phenylalanine give context to a myriad of disease-causing mutations  
123 in and around the neck (fig. S5e).

124 The structures reveal that the open pore of BEST1 comprises a 90 Å-long water-filled  
125 vestibule and a short constriction at the cytosolic aperture (Fig. 1b). The aperture constriction  
126 is only 3 Å long (measured where the pore diameter is < 4 Å); its walls are formed solely by  
127 the side chains V205 of the five subunits (Fig. 4a). Retinitis pigmentosa can be caused by  
128 mutation of the corresponding residue of human BEST1 (I205T mutation)(18), which suggests  
129 that the aperture has an important role in channel function. The structures reveal that the  
130 aperture has the same conformation in the open and closed states (Fig. 1a, b); accordingly the  
131 V205A mutation of chicken BEST1, which would be expected to widen the aperture markedly,  
132 has no effect on  $\text{Ca}^{2+}$ -dependent activation or inactivation (7, 15). We conclude that the  
133 aperture does not function as the activation or inactivation gate. However, mutations of V205  
134 have dramatic effects on ion permeability(7) (Fig 4c,d). Both human and chicken BEST1 have  
135 a lyotropic permeability sequence in which small anions that are more easily dehydrated than  
136  $\text{Cl}^-$ , such as  $\text{Br}^-$ ,  $\text{I}^-$  and  $\text{SCN}^-$ , are more permeable(7, 19-21) (Fig. 4c). We find that mutation of  
137 V205 to a smaller or more hydrophilic residue (e.g. glycine, alanine, or serine) abolishes the  
138 lyotropic sequence whereas mutation to isoleucine, a bulkier hydrophobic amino acid, makes

139 the permeability differences between Cl<sup>-</sup>, Br<sup>-</sup>, I<sup>-</sup> and SCN<sup>-</sup> more dramatic (Fig. 4c). Thus, the  
140 aperture controls permeability among anions. Based on the narrow diameter of the aperture,  
141 anions would shed at least some of their water molecules as they pass through it; this would  
142 give rise to the channel's lyotropic permeability sequence and may contribute to its low single  
143 channel conductance (reported at ~2 pS for Cl<sup>-</sup> for drosophila BEST1(22)). The permeability  
144 to large anions such as acetate, propionate and butyrate increases when V205 is substituted  
145 by alanine or glycine (Fig. 4d), and thus, as has been suggested previously(7), the aperture  
146 functions as a size-selective filter that would tend to prevent permeation of large cellular  
147 constituents such as proteins or nucleic acids. Notably, the amino acid sequence at and  
148 around the aperture varies among BEST channels (Fig. 4b), and this may endow these  
149 channels with distinct permeabilities related to their specific physiological functions. Data  
150 suggest that the inhibitory neurotransmitter GABA permeates through BEST1 to underlie a  
151 tonic form of synaptic inhibition in glia (13). While this possibility seemed incongruous with  
152 the narrowness of the neck observed in the initial structure, the widened neck of the open  
153 conformation and the presence of a single constriction that controls permeability make the  
154 possibility of slow conductance of GABA and/or other solutes of similar size more plausible.  
155 Although the aperture adopts an indistinguishable conformation in all of the structures, we  
156 suspect that "breathing" (e.g. thermal motions) of the protein could allow larger ions to move  
157 through the aperture than might otherwise fit. It is also conceivable that the binding of  
158 cellular ligands near the aperture, as has been suggested for ATP (23) , could influence  
159 channel behavior by changing its dimensions somewhat. The structure of the open pore hints  
160 at a rich diversity of potential physiological functions for BEST channels that are largely  
161 unexplored.

162 The structures presented herein represent the major gating transitions in the channel  
163 (Fig. 4e). Unlike voltage-dependent K<sup>+</sup> and Na<sup>+</sup> channels, in which ions are prevented from  
164 flowing by different mechanisms in the inactivated and deactivated states (21, 24), the same  
165 closed conformation of the neck is responsible for the deactivated (Ca<sup>2+</sup>-free) and inactivated  
166 states of BEST1. While localized twisting or domain motions often constitute the activation  
167 mechanism of ion channels, dramatic molecular choreography within the protein core of BEST1  
168 underlies opening and represents a new paradigm for ion channel gating.

---

## 169 **Materials and Methods**

### 170 Cloning, expression and purification of BEST1

171 Chicken BEST1 (UniProt E1C3A0) constructs (amino acids 1-405 or 1-345 followed by a Glu-  
172 Gly-Glu-Glu-Phe tag) were expressed in *Pichia Pastoris* as described previously(6). Mutations  
173 were made using standard molecular biology techniques.

174 In preparation for cryo-EM analysis, purification of BEST1 proteins were performed as  
175 described previously with modification (6). BEST1 protein was purified by size-exclusion  
176 chromatography (SEC; Superose 6 increase 10/300 GL; GE Healthcare) in buffer containing 20  
177 mM Tris, pH 7.5, 50 mM NaCl, 1 mM *n*-dodecyl- $\beta$ -D-maltopyranoside (DDM; Anatrace) and 0.1  
178 mM cholesteryl hemisuccinate (CHS; Anatrace). Purified BEST1 was concentrated to 5 mg ml<sup>-1</sup>  
179 using a 100 kDa concentrator (Amicon Ultra-4, Millipore) and divided into aliquots. For  
180 structures with Ca<sup>2+</sup>, 1  $\mu$ M CaCl<sub>2</sub> was added to the freshly purified protein. For Ca<sup>2+</sup>-free  
181 structures, and 5 mM EGTA, pH 7.5 was added to the freshly purified protein. These samples

182 were immediately used for cryo-EM grid preparation.

### 183 EM sample preparation and data acquisition

184 5  $\mu$ l of sample was pipetted onto Quantifoil R1.2/R1.3 holey carbon grids (Au 400, Electron  
185 Microscopy Sciences), which had been glow discharged for 10 s using a PELCO easiGlow glow  
186 discharge cleaning system (Ted Pella). A vitrobot Mark IV cryo-EM sample plunger (FEI)  
187 (operated at room temperature with a 1-2 s blotting time under a blot force of 0 and 100%  
188 humidity) was used to plunge-freeze the sample into liquid nitrogen-cooled liquid ethane. For  
189  $\text{Ca}^{2+}$ -free conditions, the blotting paper used for grid freezing was pre-treated with 2 mM EGTA  
190 solution (4x), rinsed with ddH<sub>2</sub>O (4x) and dried under vacuum. Grids were clipped and loaded  
191 into a 300 keV Titan Krios microscope (FEI) equipped with a K2 Summit direct electron  
192 detector (Gatan). Images were recorded with SerialEM(25) in super-resolution mode at a  
193 magnification of 22,500x, which corresponds to a super-resolution pixel size of 0.544 Å, and a  
194 defocus range of -0.7 to -2.15  $\mu$ m. The dose rate was 9 electrons per physical pixel per second,  
195 and images were recorded for 10 seconds with 0.25 s subframes (40 total frames),  
196 corresponding to a total dose of 76 electrons per Å<sup>2</sup>.

### 197 Image processing

198 Figures S1, S2, S6 and S9 show the cryo-EM workflow for  $\text{Ca}^{2+}$ -bound BEST1<sub>405</sub>,  $\text{Ca}^{2+}$ -bound  
199 BEST1<sub>345</sub>,  $\text{Ca}^{2+}$ -free BEST1<sub>345</sub> and BEST1<sub>345</sub> W287F with and without  $\text{Ca}^{2+}$ , respectively. Movie  
200 stacks were gain-corrected, two-fold Fourier cropped to a calibrated pixel size of 1.088 Å,  
201 motion corrected and dose weighted using MotionCor2(26). Contrast Transfer Function (CTF)  
202 estimates for motion-corrected micrographs were performed in CTFFIND4 using all frames  
203 (27).

204 *Ca<sup>2+</sup>-bound BEST1<sub>405</sub>, BEST1<sub>345</sub> and BEST1<sub>345</sub> W287F datasets*

205 All subsequent image processing was carried out with RELION2.1(28), using a particle box size  
206 of 384 pixels and a spherical mask with a diameter of 140-160 Å. A total of 1740, 1644 and  
207 1597 micrographs were collected for Ca<sup>2+</sup>-bound BEST1<sub>405</sub>, BEST1<sub>345</sub> and BEST1<sub>345</sub> W287F,  
208 respectively, and all micrographs were inspected manually; poor quality micrographs and those  
209 having CTF estimation fits lower than 5 Å were discarded. Approximately 1000 particles were  
210 selected manually for reference-free 2D classification to generate templates that were then used  
211 for automatic particle picking. Auto-picking yielded ~312,000, ~309,000 and ~308,000  
212 particles for BEST1<sub>405</sub>, BEST1<sub>345</sub> and BEST1<sub>345</sub> W287F, respectively. One round of 2D  
213 classification, using 100 classes, was used to remove outlier particles (e.g. ice contaminants),  
214 and this yielded ~290,000 particles for BEST1<sub>405</sub> and BEST1<sub>345</sub> datasets and ~265,000 particles  
215 for BEST1<sub>345</sub> W287F. 3D refinement, using C5 symmetry, was performed for each dataset using  
216 an initial model (generated from a previously collected, lower resolution cryo-EM dataset of  
217 Ca<sup>2+</sup>-free BEST1 using EMAN2(29)) that was low-pass filtered at 60 Å resolution. This yielded  
218 consensus reconstructions at 3.1 Å (BEST1<sub>405</sub>) and 2.9 Å (BEST1<sub>345</sub>) overall resolutions that  
219 have the closed conformation of the neck and 2.8 Å for BEST1<sub>345</sub> W287F that an open  
220 conformation at the neck. (Refinement using C1 symmetry also yielded reconstructions with 5-  
221 fold symmetry.) All overall resolution estimates are based on gold-standard Fourier shell  
222 correlations (FSC).

223 To identify the distinct conformational states within the Ca<sup>2+</sup>-bound BEST1<sub>345</sub> dataset,  
224 we performed 3D classification using the consensus reconstruction as an initial model (low-  
225 pass filtered at 5 Å resolution) and sorting the particles into 9 classes. One class with a widened  
226 neck (BEST1<sub>345</sub> open) was isolated, containing ~ 30,000 particles. To identify additional open

227 particles from the dataset, this reconstruction was low-pass filtered at 5 Å resolution and used  
228 as an initial model for 3D classification (with 4 classes) on the entire dataset. This procedure  
229 yielded one class in the open conformation (containing approximately 40,000 particles) and  
230 three classes in the Ca<sup>2+</sup>-bound closed conformation (containing the remainder of the particles).  
231 One class for the closed conformation was chosen (containing approximately 44,000 particles)  
232 because it contained better-resolved density for the residues lining the neck (I176, F80, F84). 3D  
233 Refinement of these two classes yielded reconstructions at 3.0 Å overall resolution. Particles  
234 from these two classes were “polished” using aligned movie frames generated from  
235 MotionCor2(26). 3D refinement using the polished particles and a global angular sampling  
236 threshold of 1.75° yielded final reconstructions at 3.0 Å and 2.9 Å overall resolutions for the  
237 Ca<sup>2+</sup>-bound closed and open reconstructions of BEST1<sub>345</sub>, respectively. The same polishing  
238 strategy for the BEST1<sub>345</sub> W287F dataset yielded a final reconstruction of 2.7 Å. Several  
239 analogous 3D classification procedures were performed to try to identify an open conformation  
240 in the Ca<sup>2+</sup>-bound BEST1<sub>405</sub> dataset but none were found. Conversely, 3D classification  
241 approaches with the Ca<sup>2+</sup>-bound BEST1<sub>W287F</sub> dataset to identify multiple conformations yielded  
242 only reconstructions with an open neck.

#### 243 *Ca<sup>2+</sup>-free BEST1<sub>345</sub> and Ca<sup>2+</sup>-free BEST1<sub>345</sub> W287F datasets*

244 Initial image processing was carried out with RELION2.1(28), using a particle box size of 384  
245 pixels and a mask diameter of 140. A total of ~1000 or ~1600 micrographs were collected for  
246 Ca<sup>2+</sup>-free BEST1<sub>345</sub> and Ca<sup>2+</sup>-free BEST1<sub>345</sub> W287F, respectively, and manually pruned as  
247 described for the Ca<sup>2+</sup>-bound dataset. Auto-picking templates were generated as described and  
248 the selected particles (~150,000 for the Ca<sup>2+</sup>-free BEST1<sub>345</sub> and ~185,000 particles for the  
249 BEST1<sub>345</sub> W287F datasets) were subjected to one round of 2D classification with 100 classes.



250 3D refinement was performed using the selected particles from 2D classification ( $\sim 130,000$  for  
251 the  $\text{Ca}^{2+}$ -free BEST<sub>1345</sub> and  $\sim 150,000$  particles for the  $\text{Ca}^{2+}$ -free BEST<sub>1345</sub> W287F datasets), C5  
252 symmetry, and the EMAN2-generated initial model. This yielded reconstructions of 3.4 Å and  
253 3.2 Å overall resolutions, respectively. Particle polishing was performed on each dataset and  
254 the polished particles were imported into the cisTEM cryo-EM software package for further  
255 refinement and classification(30). 3D refinement was performed in cisTEM using a mask to  
256 apply a 15 Å low-pass filter to the micelle region. This yielded final reconstructions to 3.0 Å  
257 overall resolution for both datasets. The  $\sim 5^\circ$  relative rotation of the cytosolic region with  
258 respect to the transmembrane region that was observed under  $\text{Ca}^{2+}$ -free conditions was  
259 identified using 3D classification (using 6 or 8 classes for  $\text{Ca}^{2+}$ -free BEST<sub>1345</sub> and  $\text{Ca}^{2+}$ -free  
260 BEST<sub>1345</sub> W287F, respectively) using spatial frequencies up to 6 Å for refinement. Refinement  
261 of 3D classes with the most extreme rotation (e.g. approximately  $\pm 2.5^\circ$  rotations relative to the  
262 consensus reconstruction) in cisTEM yielded overall resolutions of 3.6 Å ( $\text{Ca}^{2+}$ -free BEST<sub>1345</sub>  
263 conformation A,  $\sim 11,000$  particles), 3.4 Å ( $\text{Ca}^{2+}$ -free BEST<sub>1345</sub> conformation B,  $\sim 21,000$   
264 particles), 3.4 Å ( $\text{Ca}^{2+}$ -free BEST<sub>1345</sub> W287F conformation A,  $\sim 21,000$  particles) and 3.5 Å ( $\text{Ca}^{2+}$ -  
265 free BEST<sub>1345</sub> W287F conformation B,  $\sim 17,000$  particles). These reconstructions for  $\text{Ca}^{2+}$ -free  
266 BEST<sub>1345</sub> are depicted in Supplementary Figure 8.

267 RELION2.1(28) was used to estimate of the local resolution all of the final maps. The  
268 maps shown in figures are combined maps, were sharpened (using a  $B$ -factor of  $-50-75 \text{ \AA}^2$ ), and  
269 low-pass filtered at the final overall resolution of each map.

### 270 Model building and refinement

271 The atomic models were manually built into one of the half-maps (which had been sharpened  
272 using a  $B$ -factor of  $-50-75 \text{ \AA}^2$  and low-pass filtered at the final overall resolution) using the X-ray

273 structure of BEST1 as a starting point (PDB ID: 4RDQ) and were refined in real space using the  
274 COOT software(31). The atomic models were further refined in real space against the same half-  
275 map using PHENIX (32). The final models have good stereochemistry and good Fourier shell  
276 correlation with the other half-map as well as the combined map (Supplementary Figures 3 and  
277 7). Structural figures were prepared with Pymol (pymol.org), Chimera (33), and HOLE (34).

#### 278 Liposome reconstitution

279 SEC-purified protein [in SEC buffer: 150 mM NaCl, 20 mM Tris-HCl, pH7.5, 3 mM *n*-decyl- $\beta$ -D-  
280 maltoside (DM; Anatrace)] was reconstituted into liposomes. A 3:1 (wt/wt) mixture of POPE  
281 (Avanti) and POPG (Avanti) lipids was prepared at 20 mg ml<sup>-1</sup> in reconstitution buffer (10 mM  
282 Hepes-NaOH, pH 7.6, 450 mM NaCl, 0.2 mM EGTA, 0.19 mM CaCl<sub>2</sub>). 8% (wt/vol) *n*-octyl- $\beta$ -D-  
283 maltopyranoside (Anatrace) was added to solubilize the lipids and the mixture was incubated  
284 with rotation for 30 min at room temperature. Purified protein was mixed with an equal volume  
285 of the solubilized lipids to give a final protein concentration of 0.2-1 mg ml<sup>-1</sup> and a lipid  
286 concentration of 10 mg ml<sup>-1</sup>. Proteoliposomes were formed by dialysis (using a 8000 Da  
287 molecular mass cutoff) for 1-2 days at 4 °C against 2-4 L of reconstitution buffer and were flash  
288 frozen in liquid nitrogen and stored at -80 °C until use.

#### 289 Electrophysiological recordings

290 Proteoliposomes were thawed and sonicated for approximately 10 s using an Ultrasonic  
291 Cleaner (Laboratory Supplies Company). All data are from recordings made using the Warner  
292 planar lipid bilayer workstation (Warner Instruments). Two aqueous chambers (4 mL) were  
293 filled with bath solutions. Chlorided silver (Ag/AgCl) wires were used as electrodes,  
294 submerged in 3 M KCl, and connected to the bath solutions via agar-KCl salt bridges [2%  
295 (wt/vol) agar, 3 M KCl]. The bath solutions were separated by a polystyrene partition with a

296 ~200- $\mu$ M hole across which a bilayer was painted using POPE:POPG in *n*-decane [3:1 (wt/wt)  
297 ratio at 20 mg ml<sup>-1</sup>]. Proteoliposomes were applied to the bilayer with an osmotic gradient  
298 across the bilayer with solutions consisting of: 30 mM KCl or NaCl (*cis* side) and 10 mM KCl or  
299 NaCl (*trans* side), 20 mM Hepes-NaOH, pH 7.6 and 0.21 mM EGTA/0.19 mM CaCl<sub>2</sub> ([Ca<sup>2+</sup>]<sub>free</sub> ~  
300 300 nM) or 1  $\mu$ M CaCl<sub>2</sub>. Proteoliposomes were added, 1  $\mu$ L at a time, to the *cis* chamber to a  
301 preformed bilayer until ionic currents were observed. Solutions were stirred using a stir plate  
302 (Warner Instruments stir plate) to aid vesicle fusion. After fusion, the solutions were made  
303 symmetric by adding 3M KCl or 5M NaCl, depending on the starting solutions, to the *trans*  
304 side. Unless noted, all reagents were purchased from Sigma-Aldrich. All electrical recordings  
305 were taken at room temperature (22-24 °C).

306         Measurements of relative permeabilities among anions were performed as described  
307 previously(7). Briefly, after establishing symmetric (30/30 mM KCl or NaCl) conditions, the  
308 bath solution in the *trans* chamber was replaced by perfusion with solutions in which KCl or  
309 NaCl was replaced by various potassium salts (Br, I, SCN, acetate, propionate) or sodium salts  
310 (butyrate).

311         Currents were recorded using the Clampex 10.4 program (Axon Instruments) with an  
312 Axopatch 200B amplifier (Axon Instruments) and were sampled at 200  $\mu$ s and filtered at 1  
313 kHz. Data were analyzed using Clampfit 10.4 (Axon Instruments). Graphical display and  
314 statistical analyses were carried out using GraphPad Prism 6.0 software. In all cases, currents  
315 from bilayers without channels were subtracted. Error bars represent the SEM of at least  
316 three separate experiments, each in a separate bilayer. We define the side to which the  
317 vesicles are added as the *cis* side and the opposite *trans* side as electrical ground, so that

318 transmembrane voltage is reported as  $V_{\text{cis}}-V_{\text{trans}}$ . Ion channels are inserted in both  
319 orientations in the bilayer.

## Reference and Notes

1. K. Petrukhin *et al.*, Identification of the gene responsible for Best macular dystrophy. *Nat. Genet.* **19**, 241–247 (1998).
2. A. Marquardt *et al.*, Mutations in a novel gene, VMD2, encoding a protein of unknown properties cause juvenile-onset vitelliform macular dystrophy (Best's disease). *Hum. Mol. Genet.* **7**, 1517–1525 (1998).
3. A. A. Johnson *et al.*, Bestrophin 1 and retinal disease. *Progress in Retinal and Eye Research.* **58**, 45–69 (2017).
4. Q. Xiao, H. C. Hartzell, K. Yu, Bestrophins and retinopathies. *Pflügers Archiv - European Journal of Physiology.* **460**, 559–569 (2010).
5. H. C. Hartzell, Z. Qu, K. Yu, Q. Xiao, L.-T. Chien, Molecular Physiology of Bestrophins: Multifunctional Membrane Proteins Linked to Best Disease and Other Retinopathies. *Physiological Reviews.* **88**, 639–672 (2008).
6. V. Kane Dickson, L. Pedi, S. B. Long, Structure and insights into the function of a Ca<sup>2+</sup>-activated Cl<sup>-</sup> channel. *Nature.* **516**, 213–218 (2014).
7. G. Vaisey, A. N. Miller, S. B. Long, Distinct regions that control ion selectivity and calcium-dependent activation in the bestrophin ion channel. *Proc. Natl. Acad. Sci. U.S.A.* **113**, E7399–E7408 (2016).
8. H. Sun, T. Tsunenari, K.-W. Yau, J. Nathans, The vitelliform macular dystrophy protein defines a new family of chloride channels. *Proceedings of the National Academy of Sciences.* **99**, 4008–4013 (2002).
9. T. Tsunenari, J. Nathans, K.-W. Yau, Ca<sup>2+</sup>-activated Cl<sup>-</sup> Current from Human Bestrophin-4 in Excised Membrane Patches. *The Journal of General Physiology.* **127**, 749–754 (2006).
10. Y. Li *et al.*, Patient-specific mutations impair BESTROPHIN1's essential role in mediating Ca<sup>2+</sup>-dependent Cl<sup>-</sup> currents in human RPE. *Elife.* **6**, 213 (2017).
11. A. Milenkovic *et al.*, Bestrophin 1 is indispensable for volume regulation in human retinal pigment epithelium cells. *Proceedings of the National Academy of Sciences.* **112**, E2630–E2639 (2015).
12. K. Yu, R. Lujan, A. Marmorstein, S. Gabriel, H. C. Hartzell, Bestrophin-2 mediates bicarbonate transport by goblet cells in mouse colon. *J. Clin. Invest.* **120**, 1722–1735 (2010).
13. S. Lee *et al.*, Channel-mediated tonic GABA release from glia. *Science.* **330**, 790–796 (2010).

14. T. Yang *et al.*, Structure and selectivity in bestrophin ion channels. *Science*. **346**, 355–359 (2014).
15. G. Vaisey, S. B. Long, An allosteric mechanism of inactivation in the calcium-dependent chloride channel BEST1. *The Journal of General Physiology*, jgp.201812190–14 (2018).
16. S. Rao, G. Klesse, P. J. Stansfeld, S. J. Tucker, M. S. P. Sansom, A BEST example of channel structure annotation by molecular simulation. *Channels*. **11**, 347–353 (2017).
17. S. C. Lovell, J. M. Word, J. S. Richardson, D. C. Richardson, The penultimate rotamer library. *Proteins*. **40**, 389–408 (2000).
18. A. E. Davidson *et al.*, Missense Mutations in a Retinal Pigment Epithelium Protein, Bestrophin-1, Cause Retinitis Pigmentosa. *The American Journal of Human Genetics*. **85**, 581–592 (2009).
19. Z. Qu, H. C. Hartzell, Anion Permeation in Ca<sup>2+</sup>-Activated Cl<sup>-</sup> Channels. *The Journal of General Physiology*. **116**, 825–844 (2000).
20. C. Hartzell, I. Putzier, J. Arreola, CALCIUM-ACTIVATED CHLORIDE CHANNELS. *Annual Review of Physiology*. **67**, 719–758 (2005).
21. D. C. Eaton, Ionic channels of excitable membranes. Bertil Hille. Sunderland, Ma: Sinauer Associates, 1984. *Journal of Neuroscience Research*. **13**, 599–600 (1985).
22. L.-T. Chien, Z.-R. Zhang, H. C. Hartzell, Single Cl<sup>-</sup> channels activated by Ca<sup>2+</sup> in *Drosophila* S2 cells are mediated by bestrophins. *The Journal of General Physiology*. **128**, 247–259 (2006).
23. Y. Zhang *et al.*, ATP activates bestrophin ion channels through direct interaction. *Nature Communications*. **9**, 12758 (2018).
24. C. M. Armstrong, Inactivation of the sodium channel. II. Gating current experiments. *The Journal of General Physiology*. **70**, 567–590 (1977).

## Reference and Notes for Supplementary Information

25. D. N. Mastronarde, Automated electron microscope tomography using robust prediction of specimen movements. *Journal of Structural Biology*. **152**, 36–51 (2005).
26. S. Q. Zheng *et al.*, MotionCor2: anisotropic correction of beam-induced motion for improved cryo-electron microscopy. *Nat. Methods*. **14**, 331–332 (2017).
27. A. Rohou, N. Grigorieff, CTFFIND4: Fast and accurate defocus estimation from electron micrographs. *Journal of Structural Biology*. **192**, 216–221 (2015).
28. R. Fernandez-Leiro, S. H. W. Scheres, A pipeline approach to single-particle processing in RELION. *Acta Crystallogr D Struct Biol*. **73**, 496–502 (2017).
29. G. Tang *et al.*, EMAN2: an extensible image processing suite for electron microscopy. *Journal of Structural Biology*. **157**, 38–46 (2007).
30. T. Grant, A. Rohou, N. Grigorieff, cisTEM, user-friendly software for single-particle image processing. *Elife*. **7**, e14874 (2018).
31. P. Emsley, B. Lohkamp, W. G. Scott, K. Cowtan, Features and development of Coot. *Acta Cryst (2010)*. *D66*, 486–501 [doi:10.1107/S0907444910007493], 1–16 (2010).
32. P. D. Adams *et al.*, (International Union of Crystallography, Chester, England, ed. 2, 2012), vol. F of *Crystallography of biological macromolecules*, pp. 539–547.
33. E. F. Pettersen *et al.*, UCSF Chimera--a visualization system for exploratory research and analysis. *J Comput Chem*. **25**, 1605–1612 (2004).
34. O. S. Smart, J. G. Neduveilil, X. Wang, B. A. Wallace, M. S. P. Sansom, HOLE: A program for the analysis of the pore dimensions of ion channel structural models. *Journal of Molecular Graphics*. **14**, 354–360 (1996).

## 320 **Acknowledgements**

321 We thank N. Grigorieff, members of his laboratory, and the staff at the Howard Hughes  
322 Medical Institute Cryo-EM facility for training and initial advice on cryo-EM. We thank M.J. de  
323 la Cruz of the Memorial Sloan Kettering Cancer Center Cryo-EM facility, M. Ebrahim, and the  
324 staff of the New York Structural Biology Center Simons Electron Microscopy Center for help  
325 with data collection. G.V received funding and mentorship from the Boehringer Ingelheim  
326 Fonds Predoctoral Fellowship Program. **Funding:** This work was supported, in part, by NIH  
327 Grant R01 GM110396 (to S.B.L) and a core facilities support grant to Memorial Sloan  
328 Kettering Cancer Center (P30 CA008748). **Author contributions:** A.N.M, G.V and S.B.L  
329 conceived of and designed the project. A.N.M determined structures of BEST1<sub>405</sub>, the W287F  
330 mutant, and structures in the absence of Ca<sup>2+</sup>. G.V determined structures of the Ca<sup>2+</sup>-bound  
331 closed state and the Ca<sup>2+</sup>-bound open state. A.N.M. and G.V performed electrophysiology  
332 experiments. All authors contributed to data analysis and the preparation of the manuscript.

333 **Competing interests:** The authors declare no competing financial interests. **Data and**

334 **materials availability:** Atomic coordinates and cryo-EM density maps of have been  
335 deposited with the PDB and Electron Microscopy Data Bank with the deposition numbers:  
336 D\_1000236792 (BEST1<sub>405</sub>, inactivated), D\_1000236798 (W287F mutant, Ca<sup>2+</sup>-free),  
337 D\_1000236800 (W287F mutant, Ca<sup>2+</sup>-bound), D\_1000236801 (Ca<sup>2+</sup>-free closed state),  
338 D\_1000236802 (Ca<sup>2+</sup>-bound closed state), and D\_1000236804 (Ca<sup>2+</sup>-bound open state).

339 Correspondence and requests for materials should be addressed to S.B.L (Longs@mskcc.org).

## 340 **Supplementary Materials**

341 Materials and Methods

342 Figs. S1 to S10

343 References (25-34)



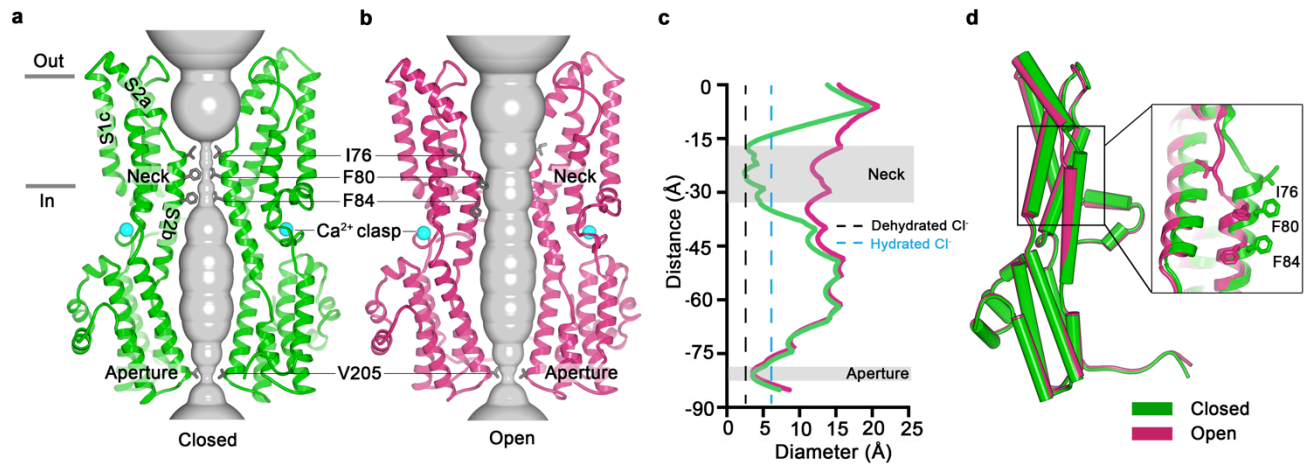

344 **Fig. 1. Open and closed conformations.** **a-b**, Cutaway views of the Ca<sup>2+</sup>-bound closed (green;  
345 nonconductive) and Ca<sup>2+</sup>-bound open (pink) conformations of BEST1<sub>345</sub>. The minimal radial  
346 distance from the center of the pore to the nearest van der Waals protein contact is shown as a  
347 grey surface. Two subunits are depicted as ribbons; three are omitted for clarity. Amino acids in  
348 the neck and aperture regions are drawn as gray sticks; Ca<sup>2+</sup> ions are cyan spheres. Approximate  
349 boundaries of the lipid membrane are indicated. **c**, Pore dimensions in the open and closed  
350 conformations. Dashed lines indicate the diameters of a dehydrated (black) and hydrated (cyan)  
351 Cl<sup>-</sup> ion. **d**, Superposition of individual subunits from the closed and open conformations with  $\alpha$ -  
352 helices depicted as cylinders. The boxed area shows a close-up of the neck region, with residues  
353 depicted as sticks.

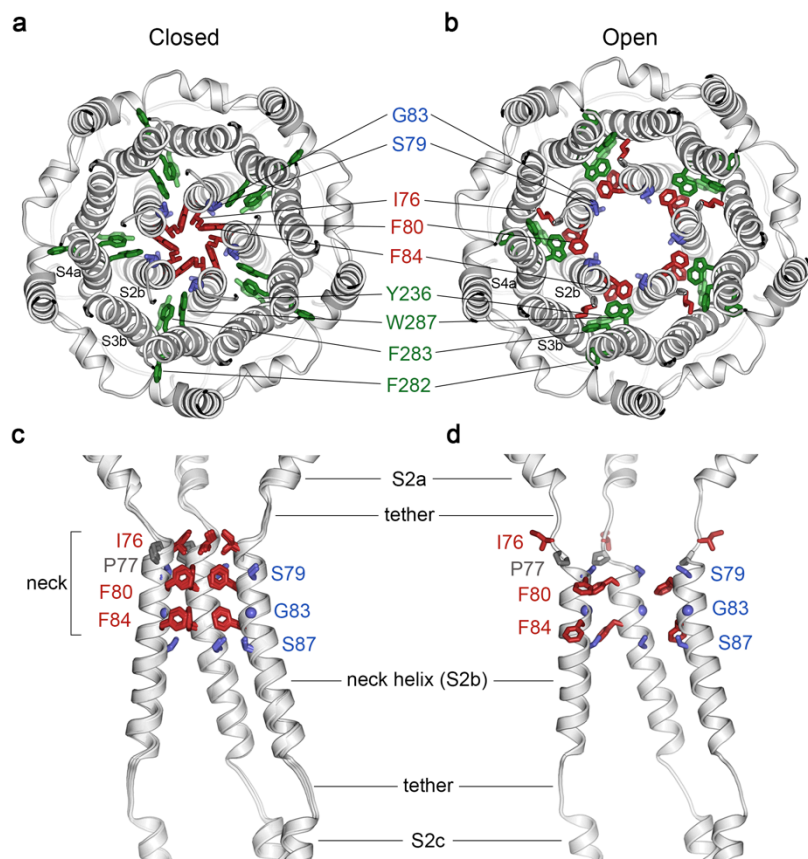

354 **Fig. 2. Opening transitions. a-b,** Cutaway views of the neck region for the closed (a) and open  
355 (b) conformations, viewed from the extracellular side and shown as ribbons. Residues that form  
356 the hydrophobic seal in the closed conformation (I76, F80, F84) are colored red in both  
357 conformations. Surrounding aromatic residues that move to accommodate opening are colored  
358 green. Residues that become exposed to the pore in the open conformation (S79, sticks, and G83,  
359 sphere) are blue. A supplementary video shows the transition. **c-d,** Side view of the  
360 conformational changes in the neck; closed (c) and open (d). In (c), a superposition of the  
361 structures of BEST1<sub>405</sub> in the Ca<sup>2+</sup>-bound inactivated conformation, BEST1<sub>345</sub> in the Ca<sup>2+</sup>-bound  
362 closed conformation, and BEST1<sub>345</sub> in the Ca<sup>2+</sup>-free closed conformation shows that the neck  
363 adopts an indistinguishable (closed) conformation in each. The S2a,b, and c helices from three  
364 subunits are shown. Residues are depicted and colored as in a-b; P77 is gray; S87 is shown for  
365 reference.

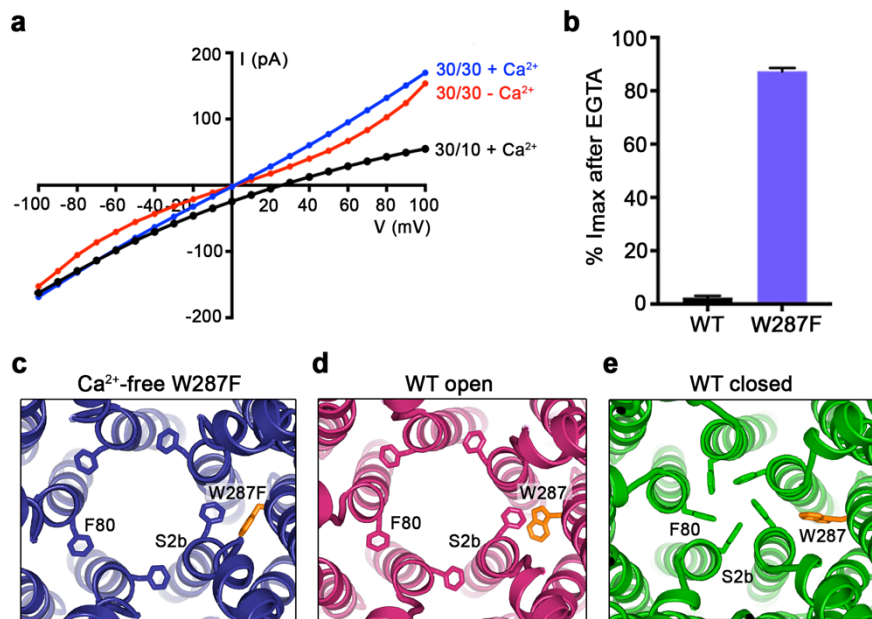

366 **Fig. 3. The W287F mutant decouples the Ca<sup>2+</sup> ligand from the activation gate. a-b,**  
367 **Dramatically reduced Ca<sup>2+</sup>-dependence but normal Cl<sup>-</sup> versus K<sup>+</sup> selectivity of the W287F mutant.**  
368 *I-V* relationships (a) are shown for voltages stepped from -100 to +100 mV for the indicated  
369 conditions [cis/trans KCl concentration in mM, and ~ 300 nM [Ca<sup>2+</sup>]<sub>free</sub> (+Ca<sup>2+</sup>) or 10 mM EGTA (-  
370 Ca<sup>2+</sup>)]. The reversal potential ( $E_{rev}$ ) measured using asymmetric KCl (30/10 mM) indicates  
371 normal Cl<sup>-</sup> versus K<sup>+</sup> selectivity:  $E_{rev} = 24.8 \pm 0.8$  mV for BEST1<sub>345</sub> W287F in comparison to  $23.4 \pm$   
372  $0.3$  mV for BEST1<sub>345</sub> [Vaisey and Long, *JGP*, *in press*]. b, Bar graph showing the percentage of  
373 current remaining after addition of 10 mM EGTA for BEST1<sub>345</sub> (WT) and the W287F mutant.  $I_{max}$   
374 indicates the current measured at +100 mV in the presence of 300 nM [Ca<sup>2+</sup>]<sub>free</sub>. Error bars  
375 denote the SEM calculated from four (WT) or six (W287F) separate experiments. **c-e,** The  
376 W287F mutant locks the neck open, even in the absence of Ca<sup>2+</sup>. c, Structure of the W287F  
377 mutant in the absence of Ca<sup>2+</sup>, showing the open conformation of the neck region (ribbons,  
378 cutaway view from an extracellular orientation). Density for the Ca<sup>2+</sup> clasp is disordered  
379 indicating that Ca<sup>2+</sup> is not bound in the structure (Extended Data Fig. 9). The W287F mutation  
380 (orange sticks) is shown for one subunit. F80 residues are drawn as sticks. Open (d) and closed  
381 (e) conformations of Ca<sup>2+</sup>-bound BEST1<sub>345</sub> are depicted in the same manner.

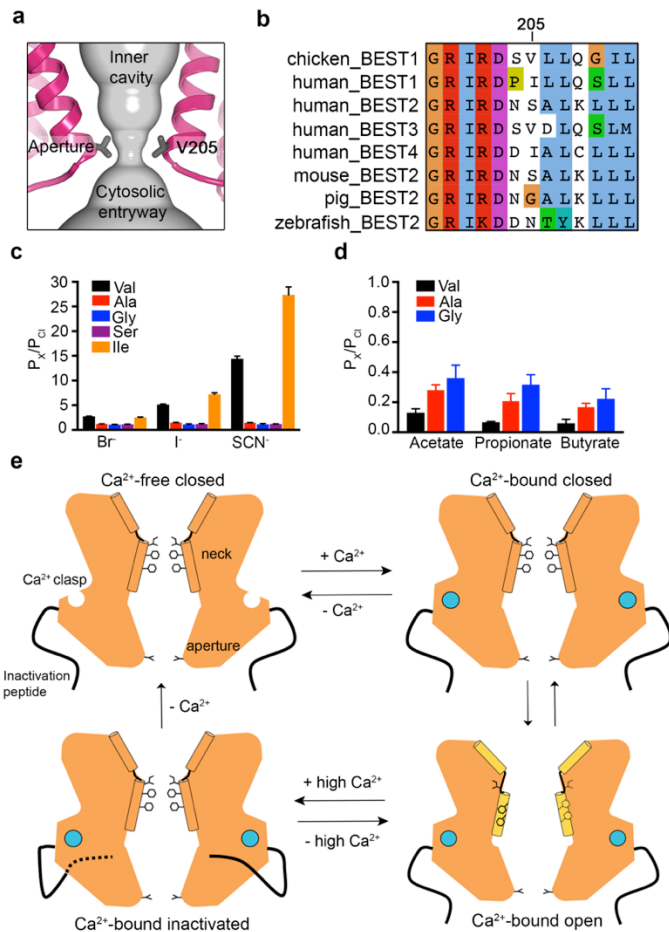

382 **Fig. 4. The aperture and a gating model.** **a**, Close up of the aperture. **b**, Sequence alignment  
 383 around the aperture. **c-d**, Mutation of V205 affects ion permeability. **c**, Comparison of the  
 384 permeabilities of Br<sup>-</sup>, I<sup>-</sup>, and SCN<sup>-</sup> relative to Cl<sup>-</sup> ( $P_X/P_{Cl}$ ) for wild type (Val) and the indicated  
 385 mutants of V205.  $P_X/P_{Cl}$  values were calculated from reversal potentials recorded in 30 mM KCl  
 386 (cis) and 30 mM KX (trans) where X is Br, I, or SCN. IV traces are shown in Fig. S10. **d**,  
 387 Permeabilities of larger anions. Comparison of the permeabilities of acetate, propionate and  
 388 butyrate relative to Cl<sup>-</sup> for wild type (Val) and the indicated mutants of V205 (calculated as in c).  
 389 For c-d, error bars denote the SEM from three experiments. **e**, Gating model. In the absence of  
 390 Ca<sup>2+</sup>, hydrophobic block at the neck prevents ion flow (Ca<sup>2+</sup>-free closed). When the Ca<sup>2+</sup> clasp  
 391 are occupied by Ca<sup>2+</sup>, the channel is in equilibrium between Ca<sup>2+</sup>-bound closed and Ca<sup>2+</sup>-bound  
 392 open conformations. The dramatic widening of the opened neck enables hydrated ions to flow  
 393 through it. Binding of the inactivation peptide to its cytosolic receptor, which is stimulated by  
 394 higher concentrations (> 500 nM) of Ca<sup>2+</sup>, induces the Ca<sup>2+</sup>-bound inactivated conformation in  
 395 which the neck is closed. The aperture, which remains fixed throughout the gating cycle, acts as  
 396 a size-selective filter that requires permeating ions to become partially dehydrated as they pass  
 397 through it, and this engenders the channel's lyotropic permeability sequence.

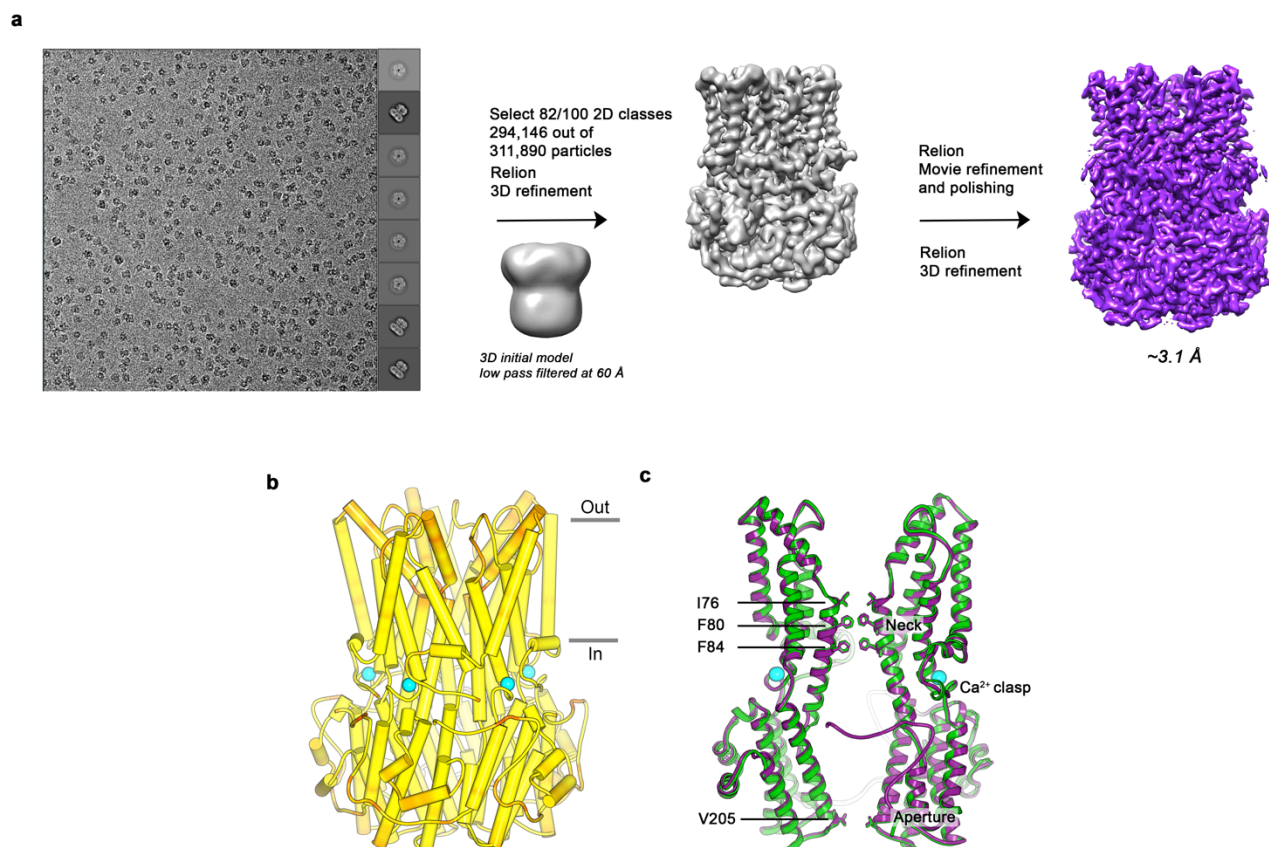

398 **Fig. S1. Cryo-EM workflow for the BEST<sub>1405</sub> Ca<sup>2+</sup>-bound dataset and comparison of EM and**  
399 **X-ray structures. a**, Cryo-EM workflow for the Ca<sup>2+</sup>-bound BEST<sub>1405</sub> dataset (inactivated  
400 conformation). A detailed description can be found in the Methods. **b**, The X-ray and EM  
401 structures of BEST<sub>1405</sub> are essentially indistinguishable. The structure of BEST<sub>1405</sub> is drawn with  
402  $\alpha$ -helices depicted as cylinders and is colored on a yellow-to-red spectrum according to the  
403 displacement of C $\alpha$  atoms between the BEST<sub>1405</sub> cryo-EM structure and the X-ray structure (PDB  
404 ID: 4RDQ). Yellow represents displacements less than 0.5 Å and red represents displacements  
405 greater than 2 Å. Ca<sup>2+</sup> ions are depicted as cyan spheres and the approximate boundaries of a  
406 lipid membrane are indicated. **c**, A superposition shows that the Ca<sup>2+</sup>-bound closed conformation  
407 of BEST<sub>1345</sub> (green) has the same overall conformation as BEST<sub>1405</sub> (purple). Two subunits in  
408 ribbon representation are shown from the side. Ca<sup>2+</sup> ions are drawn as cyan spheres and the  
409 labeled residues are shown as sticks.



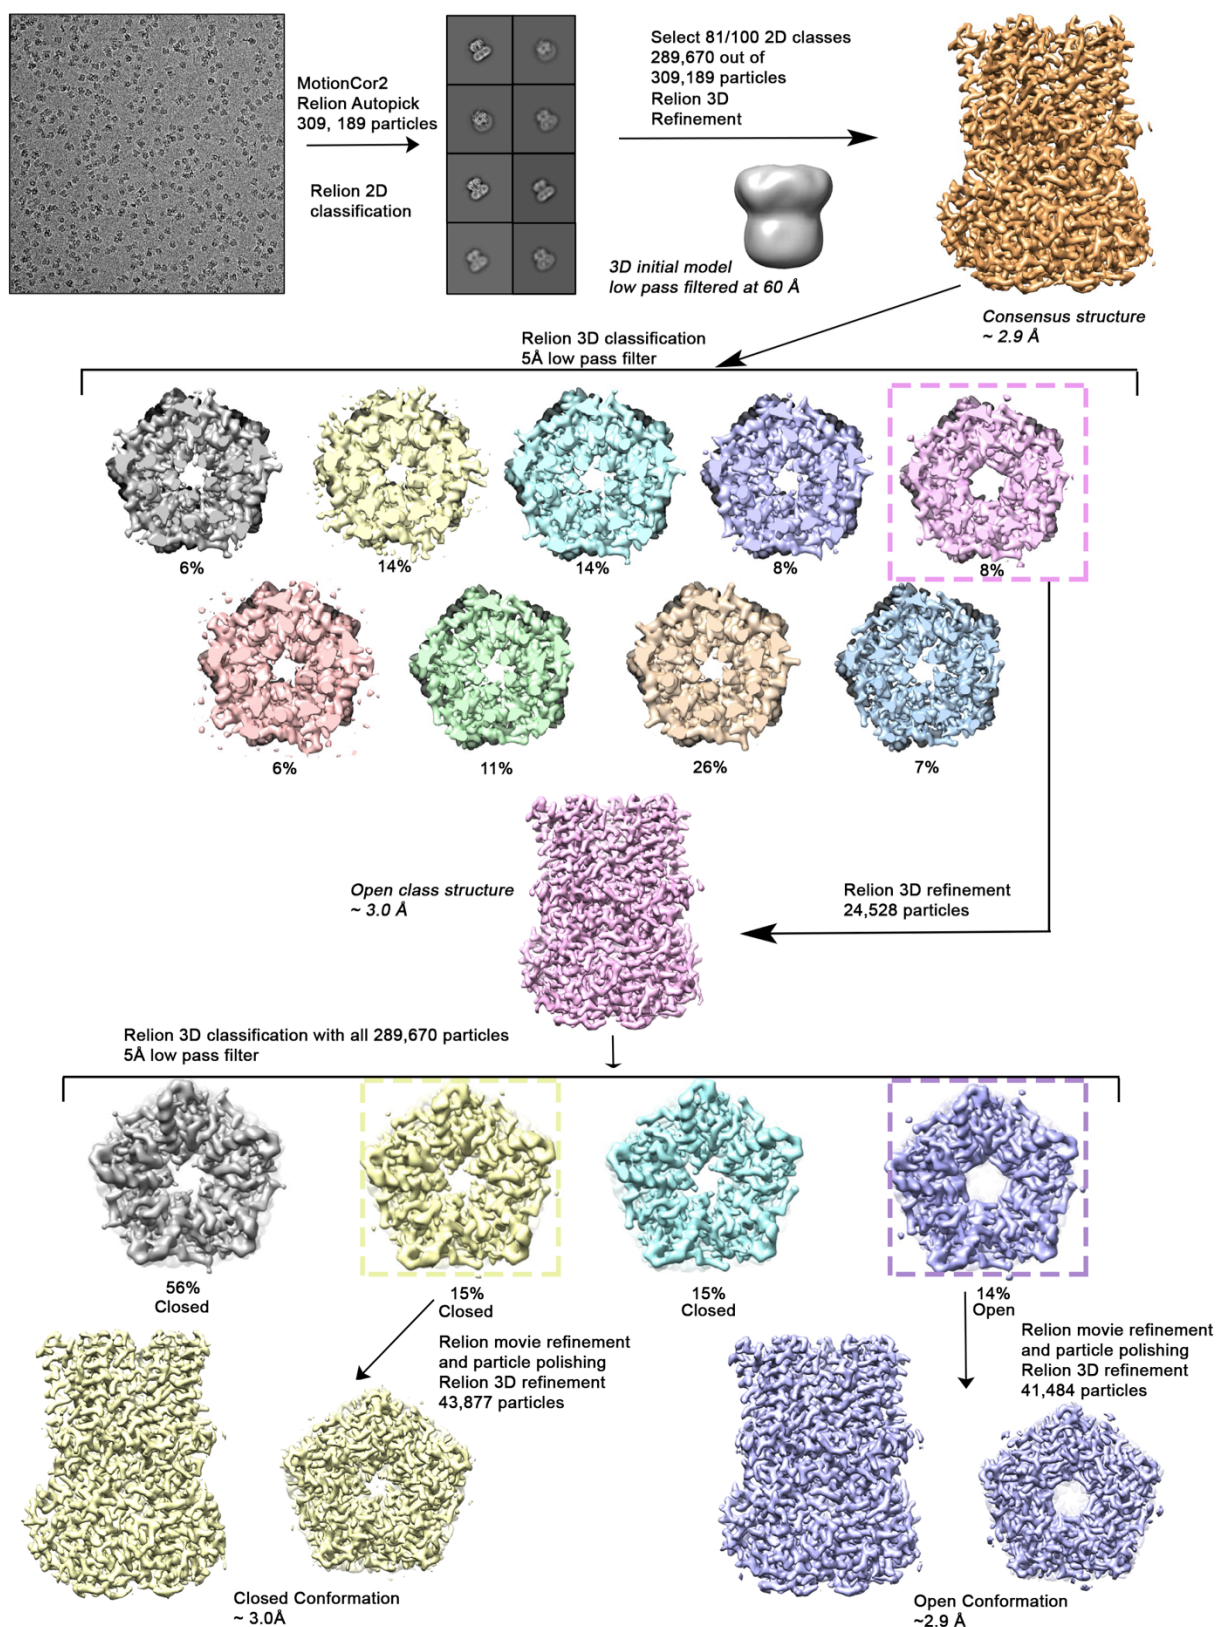

410 **Fig. S2. Cryo-EM workflow for the BEST1<sub>345</sub> Ca<sup>2+</sup>-bound dataset.** A detailed description can  
411 be found in Methods.

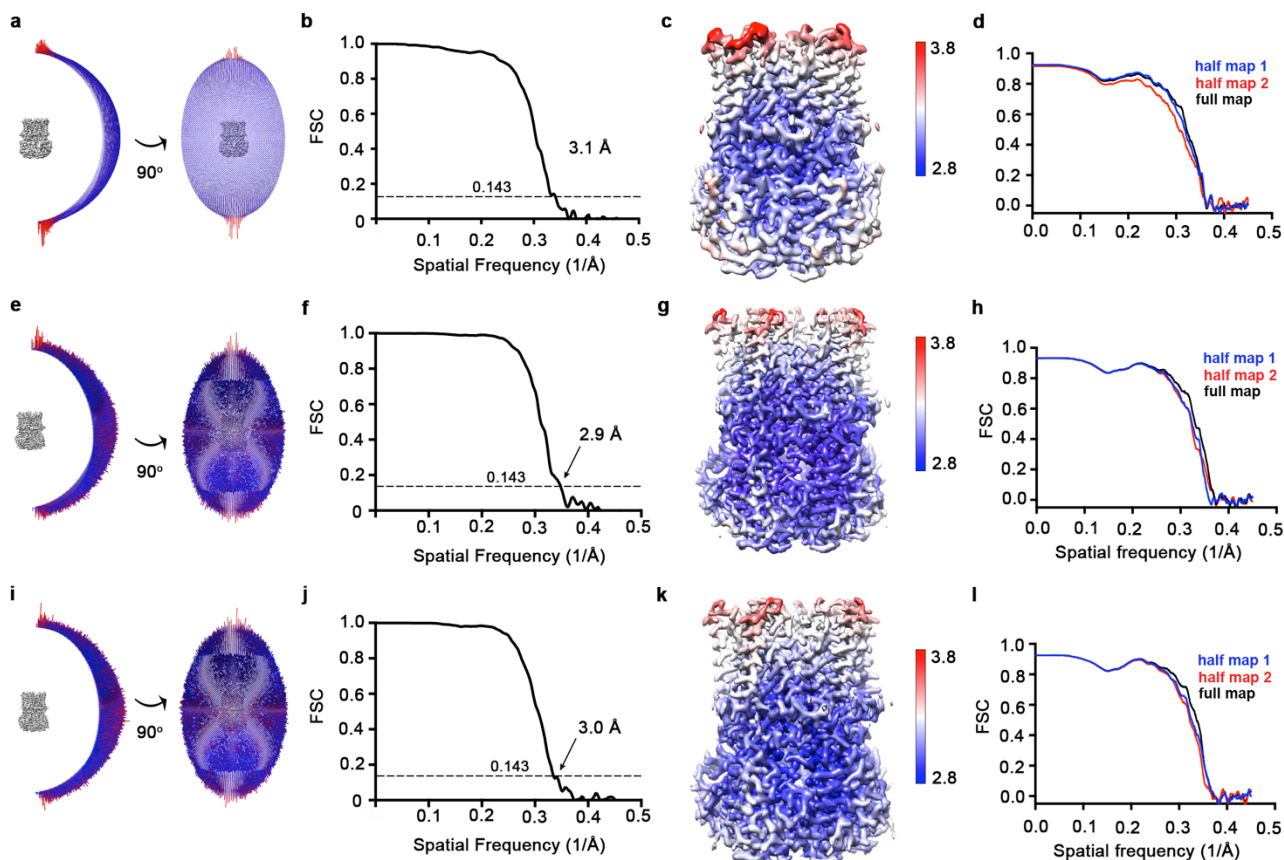

| Data collection of cryo-EM BEST1 datasets           |                 | Data processing                           |                                         |                                           |
|-----------------------------------------------------|-----------------|-------------------------------------------|-----------------------------------------|-------------------------------------------|
| Microscope                                          | FEI Titan Krios | BEST1 <sub>405</sub><br>(EMD-XXXX)        | BEST1 <sub>345</sub> open<br>(EMD-XXXX) | BEST1 <sub>345</sub> closed<br>(EMD-XXXX) |
| Camera                                              | Gatan K2 Summit | Software                                  | RELION 2.1                              | RELION 2.1                                |
| Magnification                                       | 22,500x         | Symmetry imposed                          | C5                                      | C5                                        |
| Voltage (kV)                                        | 300             | Initial particle images (no.)             | 311,890                                 | 309,189                                   |
| Electron exposure (e <sup>-</sup> /Å <sup>2</sup> ) | 76              | Final particle images (no.)               | 294,146                                 | 41,484                                    |
| Defocus range (μM)                                  | -0.7 ~ -2.5     | Overall map resolution (Å)                | 3.1                                     | 2.9                                       |
| Pixel size (Å)                                      | 1.088           | FSC threshold 0.143                       |                                         | 3.0                                       |
|                                                     |                 | Map sharpening B-factor (Å <sup>2</sup> ) | -50                                     | -50                                       |

|                               | BEST1 <sub>405</sub><br>(PDB XXXX) | BEST1 <sub>345</sub> open<br>(PDB XXXX) | BEST1 <sub>345</sub> closed<br>(PDB XXXX) |
|-------------------------------|------------------------------------|-----------------------------------------|-------------------------------------------|
| <b>Refinement</b>             |                                    |                                         |                                           |
| Software                      | Phenix 1.13 real-space-refine      | Phenix 1.13 real-space-refine           | Phenix 1.13 real-space-refine             |
| Initial model used (PDB code) | 4RDQ                               | 4RDQ                                    | 4RDQ                                      |
| Model resolution (Å)          |                                    |                                         |                                           |
| FSC threshold 0.5             | 3.1                                | 3.0                                     | 3.0                                       |
| Model composition             |                                    |                                         |                                           |
| Non-hydrogen atoms            | 14975                              | 13995                                   | 14040                                     |
| Protein residues              | 1815                               | 1690                                    | 1695                                      |
| Ligands                       | 5                                  | 5                                       | 5                                         |
| B factors (Å <sup>2</sup> )   |                                    |                                         |                                           |
| Protein                       | 87.64                              | 74.46                                   | 68.09                                     |
| Ligands                       | 80.29                              | 56.8                                    | 59.67                                     |
| R.m.s. deviations             |                                    |                                         |                                           |
| Bond length (Å)               | 0.008                              | 0.0068                                  | 0.0079                                    |
| Bond angle (°)                | 0.776                              | 1.10                                    | 1.17                                      |
| Validation                    |                                    |                                         |                                           |
| MolProbity score              | 1.24                               | 1.24                                    | 1.14                                      |
| Clashscore                    | 2.46                               | 3.56                                    | 3.44                                      |
| Poor rotamers                 | 0                                  | 0                                       | 0                                         |
| Ramachandran plot             |                                    |                                         |                                           |
| Favored (%)                   | 96.68                              | 97.56                                   | 98.16                                     |
| Allowed (%)                   | 3.32                               | 2.44                                    | 1.84                                      |
| Disallowed (%)                | 0.0                                | 0.0                                     | 0.0                                       |

412 **Fig. S3. Structure determination of: Ca<sup>2+</sup>-bound BEST1<sub>405</sub> (inactivated), Ca<sup>2+</sup>-bound open**  
413 **BEST1<sub>345</sub>, and Ca<sup>2+</sup>-bound closed BEST1<sub>345</sub>. a-d**, Structural determination of BEST1<sub>405</sub>. **a**,  
414 Angular orientation distribution of particles used in final reconstruction. The particle  
415 distribution is indicated by color shading, with blue to red representing low and high numbers of  
416 particles. **b**, Gold-standard Fourier shell correlation (FSC) curve of the final 3D reconstruction.  
417 The resolution is 3.1 Å at the FSC cutoff of 0.143 (dotted line). **c**, Local resolution of the map was  
418 estimated using Relion<sup>1</sup> and is colored as indicated. **d**, Model validation. Comparison of the FSC  
419 curves between the model and half map 1 (work), model and half map 2 (free) and model and  
420 full map. **e-h**, Structural determination of the Ca<sup>2+</sup>-bound open BEST1<sub>345</sub> structure **e**, Angular  
421 orientation distribution of particles used in final reconstruction, similar to (a). **f**, Gold-standard  
422 Fourier shell correlation (FSC) curve of the final 3D reconstruction. The resolution is 2.9 Å at the  
423 FSC cutoff of 0.143 (dotted line). **g**, Local resolution of the map, as for (c). **h**, Model validation, as  
424 for (d). **i-l**, Structural determination of the Ca<sup>2+</sup>-bound closed BEST1 structure. **i**, Angular  
425 orientation distribution of particles used in final reconstruction, similar to (a). **j**, Gold-standard  
426 Fourier shell correlation (FSC) curve of the final 3D reconstruction. The resolution is 3.0 Å at the  
427 FSC cutoff of 0.143. **k**, Local resolution of the map, as in (c). **l**, Model validation, as in (d). **m-o**,  
428 Table of data collection and model statistics for the Ca<sup>2+</sup>-bound BEST1<sub>405</sub> (inactivated), Ca<sup>2+</sup>-  
429 bound open BEST1<sub>345</sub>, and Ca<sup>2+</sup>-bound closed BEST1<sub>345</sub> structures.



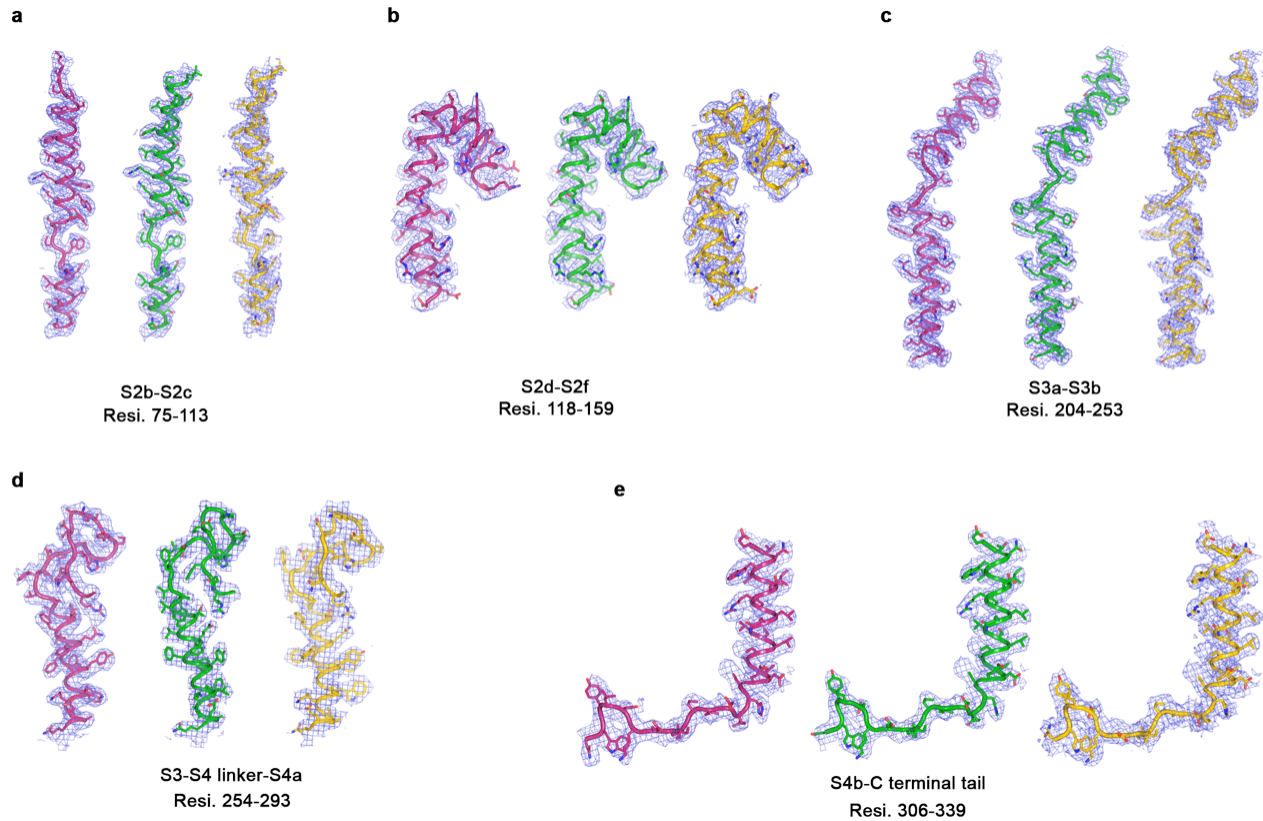

430 **Fig. S4. Representative cryo-EM density for three BEST1 cryo-EM structures. a-e,**  
431 **Representative map density (blue mesh,  $5\sigma$ ) highlighting different regions of channel in the  $\text{Ca}^{2+}$ -**  
432 **bound open BEST1<sub>345</sub> (pink),  $\text{Ca}^{2+}$ -bound closed BEST1<sub>345</sub> (green) and  $\text{Ca}^{2+}$ -free BEST1<sub>345</sub>**  
433 **(yellow).**

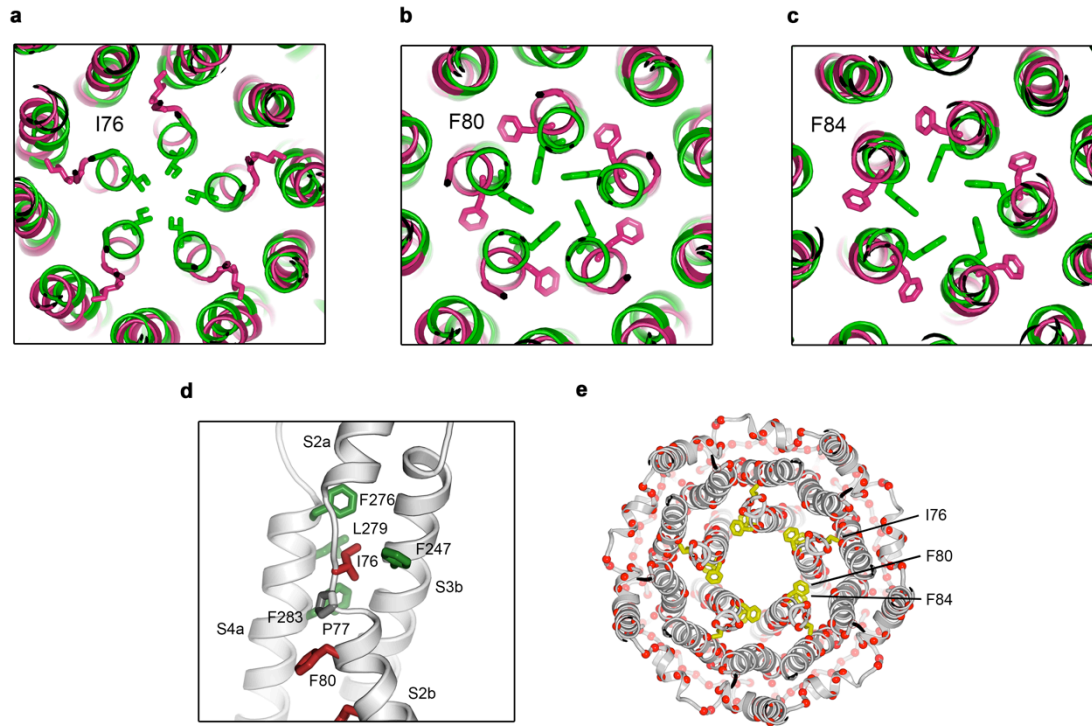

434 **Fig. S5.** **a-c**, Comparison of neck-lining residues I76, F80 and F84 between the Ca<sup>2+</sup>-bound open  
435 (pink) and Ca<sup>2+</sup>-bound closed (green) structures. Side chains of labeled residues are depicted in  
436 each panel, viewed as a cutaway from the extracellular space. **d**, A close-up view showing the  
437 hydrophobic packing of I76 in the open conformation. Neck residues are highlighted in red,  
438 neighboring hydrophobic residues that interact with I76 are shown in green, and P77 is depicted  
439 in gray. **e**, Location of missense mutations associated with retinal diseases<sup>31</sup> at amino acid  
440 positions in and around the neck of BEST1 (red spheres indicate the C $\alpha$  positions of the  
441 mutations).

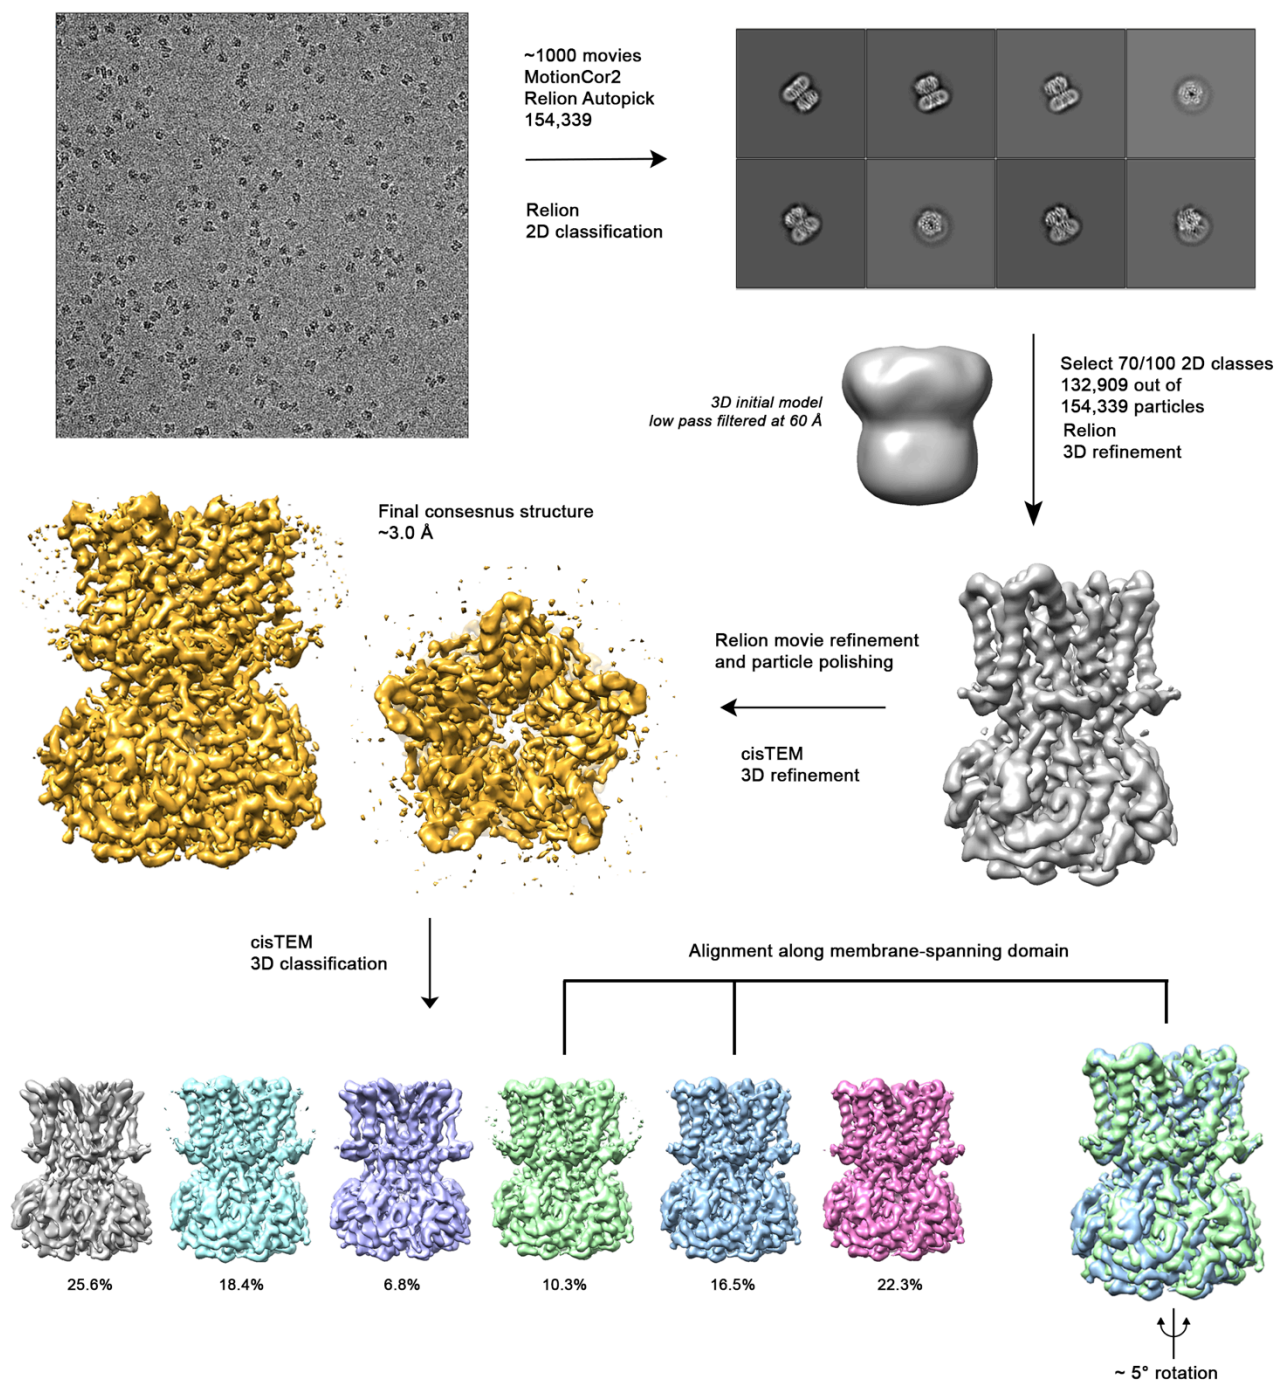

442 **Fig. S6. Cryo-EM workflow for the BEST<sub>1345</sub> Ca<sup>2+</sup>-free dataset.** A detailed description can be  
443 found in Methods.

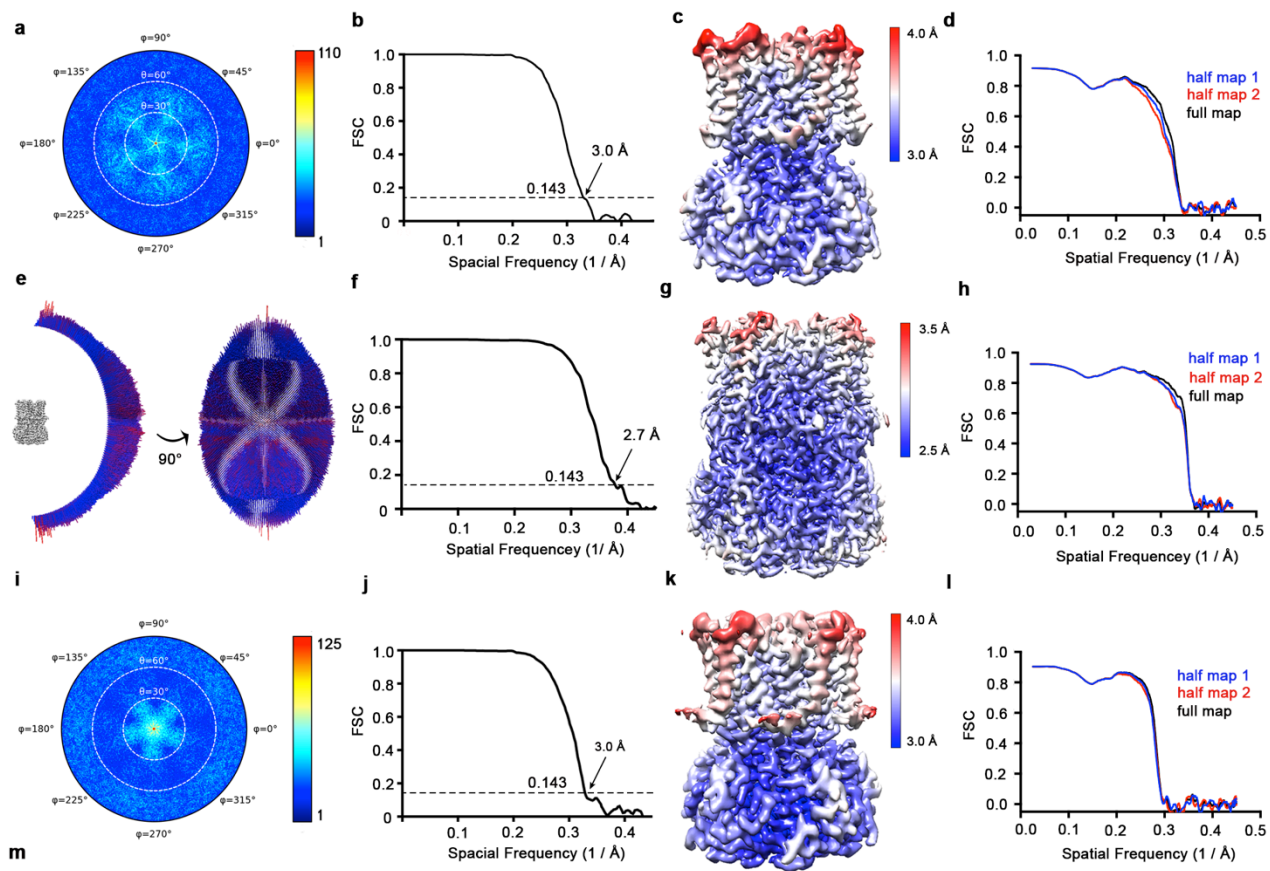

BEST<sub>1345</sub> Ca<sup>2+</sup> Free  
(EMD-XXXX)  
(PDB-XXXX)

BEST<sub>1345</sub> W287F Ca<sup>2+</sup>-bound  
(EMD-XXXX)  
(PDB-XXXX)

BEST<sub>1345</sub> W287F Ca<sup>2+</sup>-free  
(EMD-XXXX)  
(PDB-XXXX)

#### Data processing

|                                           | BEST <sub>1345</sub> Ca <sup>2+</sup> Free<br>(EMD-XXXX)<br>(PDB-XXXX) | BEST <sub>1345</sub> W287F Ca <sup>2+</sup> -bound<br>(EMD-XXXX)<br>(PDB-XXXX) | BEST <sub>1345</sub> W287F Ca <sup>2+</sup> -free<br>(EMD-XXXX)<br>(PDB-XXXX) |
|-------------------------------------------|------------------------------------------------------------------------|--------------------------------------------------------------------------------|-------------------------------------------------------------------------------|
| Software                                  | RELION 2.1, cisTEM 1.0                                                 | RELION 2.1                                                                     | RELION 2.1, cisTEM 1.0                                                        |
| Symmetry imposed                          | C5                                                                     | C5                                                                             | C5                                                                            |
| Initial particle images (no.)             | 154,339                                                                | 307,600                                                                        | 185,568                                                                       |
| Final particle images (no.)               | 132,909                                                                | 265,585                                                                        | 153,359                                                                       |
| Overall map resolution (Å)                | 3.0                                                                    | 2.7                                                                            | 3.0                                                                           |
| FSC threshold 0.143                       |                                                                        |                                                                                |                                                                               |
| Map sharpening B-factor (Å <sup>2</sup> ) | -50                                                                    | -75                                                                            | -50                                                                           |

#### Refinement

|                                  | BEST <sub>1345</sub> Ca <sup>2+</sup> Free<br>(EMD-XXXX)<br>(PDB-XXXX) | BEST <sub>1345</sub> W287F Ca <sup>2+</sup> -bound<br>(EMD-XXXX)<br>(PDB-XXXX) | BEST <sub>1345</sub> W287F Ca <sup>2+</sup> -free<br>(EMD-XXXX)<br>(PDB-XXXX) |
|----------------------------------|------------------------------------------------------------------------|--------------------------------------------------------------------------------|-------------------------------------------------------------------------------|
| Software                         | Phenix 1.13 real-space-refine                                          | Phenix 1.13 real-space-refine                                                  | Phenix 1.13 real-space-refine                                                 |
| Initial model used (PDB code)    | 4RDQ                                                                   | 4RDQ                                                                           | 4RDQ                                                                          |
| Model resolution (Å)             |                                                                        |                                                                                |                                                                               |
| FSC threshold 0.5                | 3.2                                                                    | 2.9                                                                            | 3.6                                                                           |
| Model composition                |                                                                        |                                                                                |                                                                               |
| Non-hydrogen atoms               | 13395                                                                  | 13995                                                                          | 13380                                                                         |
| Protein residues                 | 1620                                                                   | 1690                                                                           | 1620                                                                          |
| Ligands                          | 0                                                                      | 5                                                                              | 0                                                                             |
| B factors (Å)                    |                                                                        |                                                                                |                                                                               |
| Protein                          | 102.72                                                                 | 55.92                                                                          | 110.91                                                                        |
| Ligand                           |                                                                        | 44.15                                                                          |                                                                               |
| R.m.s. deviations from ideality  |                                                                        |                                                                                |                                                                               |
| Bond length (Å)                  | 0.008                                                                  | 0.008                                                                          | 0.007                                                                         |
| Bond angle (°)                   | 0.824                                                                  | 0.844                                                                          | 0.77                                                                          |
| Validation                       |                                                                        |                                                                                |                                                                               |
| MolProbity score                 | 1.27                                                                   | 1.01                                                                           | 1.42                                                                          |
| Clashscore                       | 2.94                                                                   | 2.16                                                                           | 3.86                                                                          |
| Poor rotamers                    | 0                                                                      | 0                                                                              | 0.28                                                                          |
| Ramachandran plot statistics (%) |                                                                        |                                                                                |                                                                               |
| Preferred                        | 96.89                                                                  | 97.97                                                                          | 96.27                                                                         |
| Allowed                          | 3.11                                                                   | 2.08                                                                           | 3.73                                                                          |
| Outliers                         | 0                                                                      | 0                                                                              | 0                                                                             |



444 **Fig. S7. Cryo-EM structure determination of: Ca<sup>2+</sup>-free BEST1<sub>345</sub>, Ca<sup>2+</sup>-bound BEST1<sub>345</sub>**  
445 **W287F, and Ca<sup>2+</sup>-free BEST1<sub>345</sub> W287F a-d**, Structure determination of the consensus Ca<sup>2+</sup>-  
446 free BEST1<sub>345</sub> conformation. **a**, Angular orientation distribution of particles used in the final  
447 reconstruction. The particle distribution is indicated by color shading, with blue to red  
448 representing low and high numbers of particles. **b**, Gold-standard Fourier shell correlation (FSC)  
449 curve of the final 3D reconstruction. The resolution is 3.0 Å at the FSC cutoff of 0.143 (dotted  
450 line). A thin vertical line indicates that only special frequencies to 1/(5 Å) were used to  
451 determine particle alignment parameters during refinement. **c**, Local resolution of the map  
452 estimated using Relion and colored as indicated. **d**, Model validation. Comparison of the FSC  
453 curves between the model and half map 1 (work), model and half map 2 (free) and model and  
454 full map are plotted. **e-h** Structure determination of the Ca<sup>2+</sup>-bound BEST1<sub>345</sub> W287F structure  
455 as in *a-d*. **i-l**, Structure determination of the Ca<sup>2+</sup>-free BEST1<sub>345</sub> W287F structure as in *a-d*. **m**,  
456 Table of data processing and model statistics.

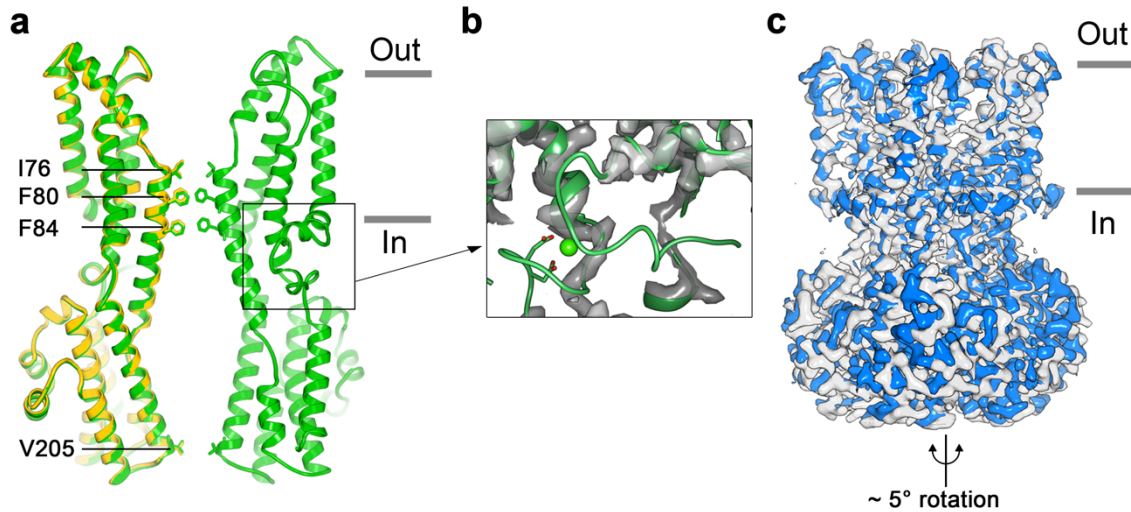

457 **Fig. S8. Structure of Ca<sup>2+</sup>-free BEST1<sub>345</sub>.** **a**, Overlay comparison of the Ca<sup>2+</sup>-free conformation of  
458 BEST1<sub>345</sub> (yellow) with the Ca<sup>2+</sup>-bound closed conformation of BEST1<sub>345</sub> (green). One (Ca<sup>2+</sup>-free)  
459 or two (Ca<sup>2+</sup>-bound) channel subunits in ribbon are shown as a cutaway from the side with the  
460 approximate boundaries of the bilayer indicated. The side chains of labeled residues are shown.  
461 The boxed area highlights the location of the Ca<sup>2+</sup>-clasp. **b**, Density for the Ca<sup>2+</sup>-clasp is missing in  
462 the absence of Ca<sup>2+</sup>. The structure of the Ca<sup>2+</sup>-clasp region that is observed in the Ca<sup>2+</sup>-bound  
463 closed structure (green) is shown in comparison with the cryo-EM density in this region in the  
464 Ca<sup>2+</sup>-free map, showing that the density for the Ca<sup>2+</sup> ion and surrounding protein residues are  
465 missing in the absence of Ca<sup>2+</sup>. Ca<sup>2+</sup> is depicted as a green sphere and two aspartate residues that  
466 coordinate Ca<sup>2+</sup> as part of the Ca<sup>2+</sup> clasp are shown as sticks. **c**, Refined cryo-EM maps of two  
467 conformations (blue, gray) of Ca<sup>2+</sup>-free BEST1<sub>345</sub> that were identified using 3D classification are  
468 depicted. The cryo-EM maps are aligned according to their membrane-spanning regions, with the  
469 relative rotation between the cytosolic regions indicated.

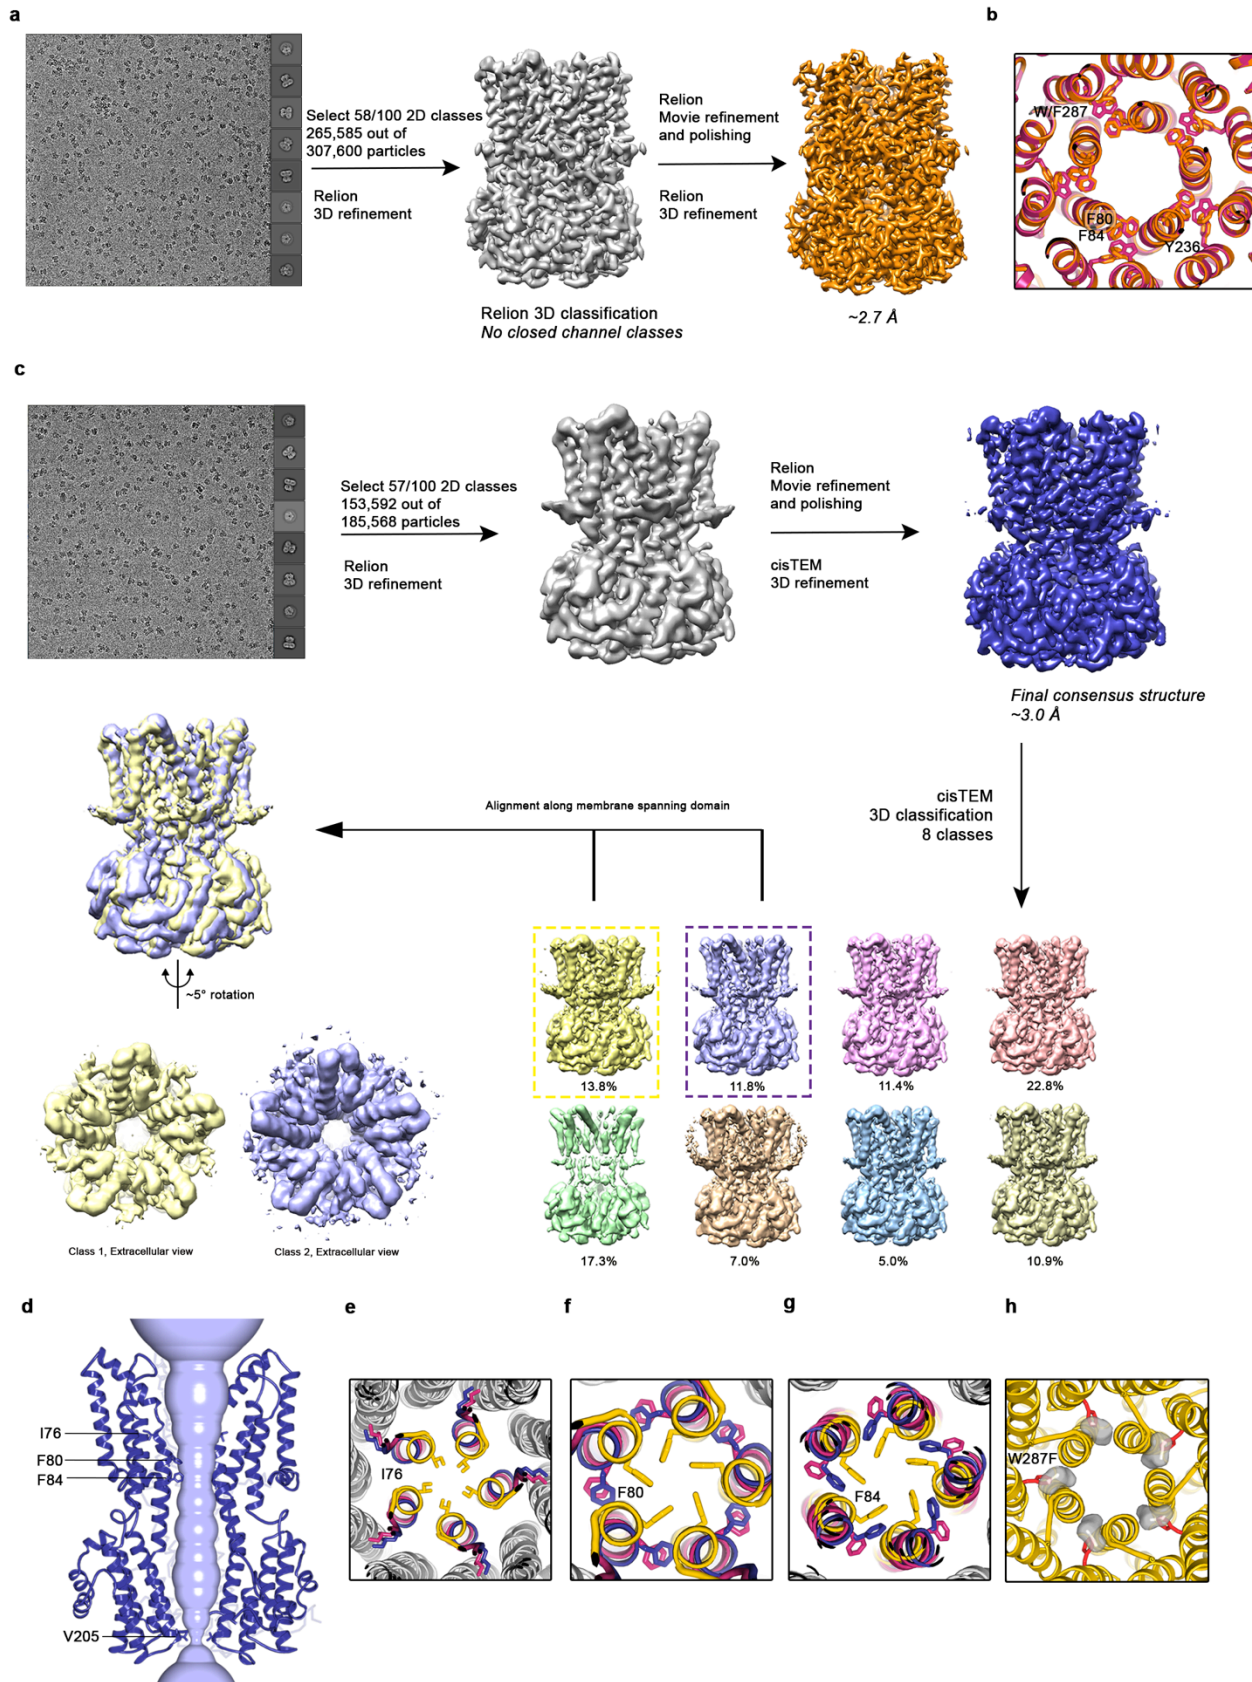

470 **Fig. S9. Cryo-EM workflow for Ca<sup>2+</sup>-bound and Ca<sup>2+</sup>-free BEST1<sub>345</sub> W287F datasets. a**, Cryo-  
471 EM workflow for Ca<sup>2+</sup>-bound BEST1<sub>345</sub> W287F. A detailed description can be found in Methods.  
472 **b**, Comparison of F80, F84, W287 (or the W287F mutation), and Y236 between the open (pink;  
473 BEST1<sub>345</sub>) and the Ca<sup>2+</sup>-bound W287F mutant (orange; BEST1<sub>345</sub> W287F) structures. A cutaway  
474 view is shown from the extracellular perspective. **c**, Cryo-EM workflow for Ca<sup>2+</sup>-free BEST1<sub>345</sub>  
475 W287F. A detailed description can be found in Methods. **d**, Even in the absence of Ca<sup>2+</sup>, the neck  
476 of the W287F mutant is open. The minimal radial distance from the center of the pore to the  
477 nearest van der Waals protein contact is shown as a light blue surface. Two subunits of Ca<sup>2+</sup>-free  
478 BEST1<sub>345</sub> W287F are depicted as ribbons; three are omitted for clarity. Amino acids in the neck  
479 an aperture regions are drawn as sticks. Approximate boundaries of the lipid membrane are  
480 indicated. **e-g**, Comparison of neck-lining residues I76 (e), F80 (f) and F84 (h) between Ca<sup>2+</sup>-free  
481 BEST1<sub>345</sub> (yellow), Ca<sup>2+</sup>-free BEST1<sub>345</sub> W287F (blue) and the open conformation of Ca<sup>2+</sup>-bound  
482 BEST1<sub>345</sub> (pink). Side chains of labeled residues are depicted in each panel, viewed as a cutaway  
483 from the extracellular space. Helices are represented as ribbons and those not lining the pore are  
484 colored in gray. **h**, Modeling of a phenylalanine residue (red sticks) in place of W287 in the  
485 closed structure of BEST1<sub>345</sub> (yellow ribbons) introduces a void (gray surface) behind the neck.  
486 The void was identified and displayed using Pymol (pymol.org).



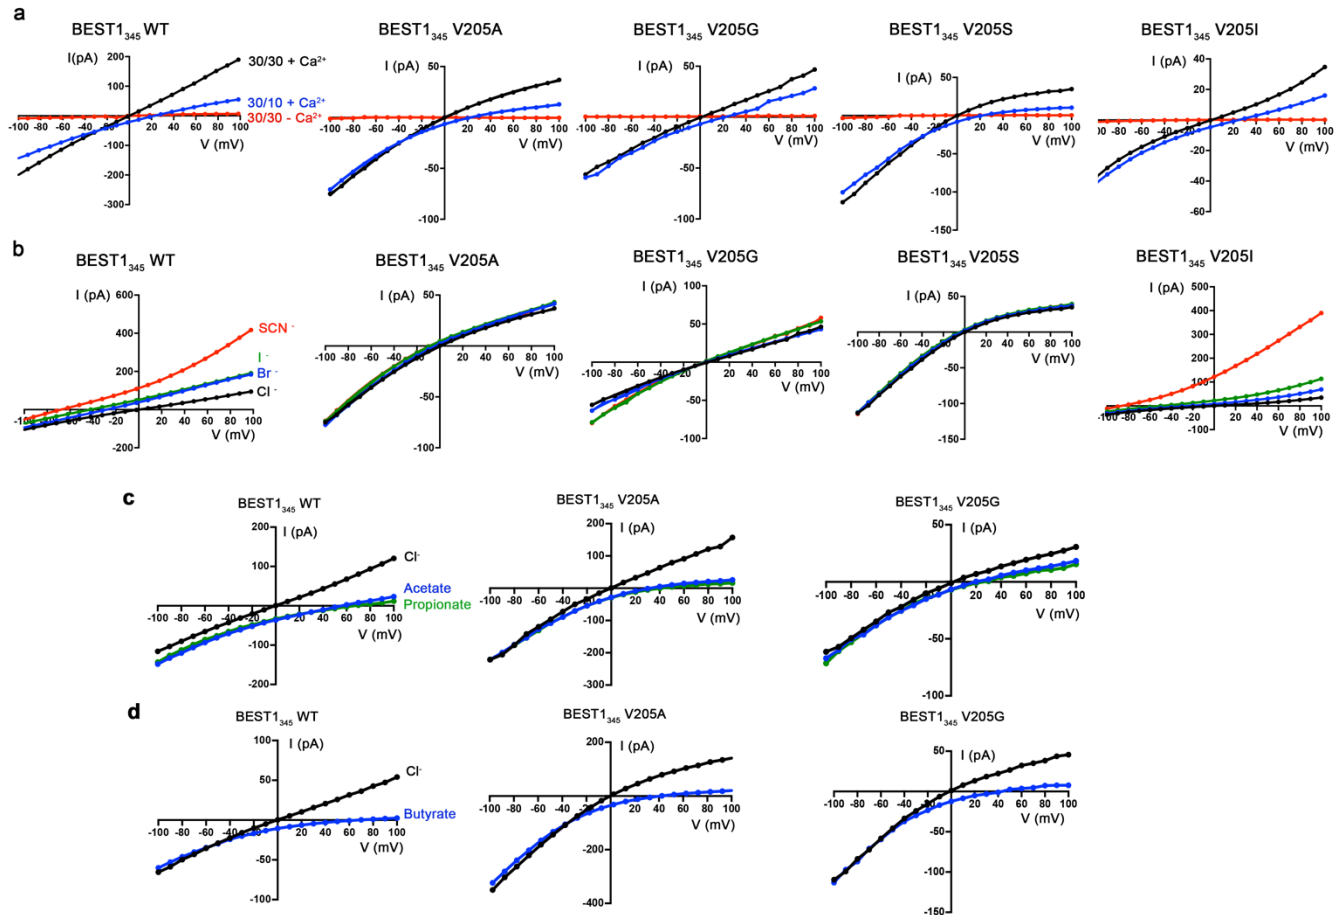

487 **Fig. S10. Current-voltage relationships of aperture mutants**  
 488 **a**, All aperture mutants exhibit  
 489 indistinguishable relative permeabilities of Cl<sup>-</sup> versus K<sup>+</sup> in comparison wild-type BEST1 and are  
 490 Ca<sup>2+</sup>-dependent. Representative *I-V* relationships are shown for voltages stepped from -100 to  
 491 +100 mV for the indicated standard conditions [cis/trans KCl concentration in mM, and ~ 300  
 492 nM [Ca<sup>2+</sup>]<sub>free</sub> (+Ca<sup>2+</sup>) or 10 mM EGTA (-Ca<sup>2+</sup>)]. **b**, *I-V* relationships of BEST1<sub>345</sub> WT (wild type) and  
 493 BEST1<sub>345</sub> V205 mutants that were used to determine permeabilities of Br<sup>-</sup>, I<sup>-</sup>, and SCN<sup>-</sup> relative to  
 494 Cl<sup>-</sup>. After first recording using symmetric 30 mM KCl (black *I-V* trace), the solution on the *trans*  
 495 side was replaced (by perfusion) with solutions containing 30 mM KBr (blue), KI (green), or  
 496 KSCN (red). **c**, Representative *I-V* relationships that were used to determine permeabilities of  
 497 acetate and propionate relative to Cl<sup>-</sup>. Experiments were performed as in (b) except that the  
 498 solution on the *trans* side was replaced with a solution containing 30 mM KCH<sub>3</sub>COO (blue) or  
 499 KC<sub>2</sub>H<sub>5</sub>COO (green). **d**, Representative *I-V* relationships that were used to determine  
 500 permeabilities of butyrate relative to Cl<sup>-</sup> for the indicated constructs. Experiments were  
 501 performed analogously to those described in (b) but used sodium salts: after recording in  
 502 symmetric 30 mM NaCl (black *I-V* trace) the solution on the *trans* side was replaced with solution  
 503 containing 30 mM NaC<sub>3</sub>H<sub>7</sub>COO (blue).

504 **Movie S1. Opening transitions.** This movie shows a morph between the closed and open  
505 conformations. Depictions are as described in Fig. 2a,b.
